# 1 Multiphasic value biases in fast-paced decisions

2 **Elaine A. Corbett**<sup>\*1,2,3</sup>, **L. Alexandra Martinez-Rodriguez**<sup>3</sup>, **Cian Judd**<sup>1,2</sup>, **Redmond G. O'Connell**<sup>1,2</sup> and  
3 **Simon P. Kelly**<sup>1,3</sup>

4 <sup>1</sup>Trinity College Institute of Neuroscience, Trinity College Dublin, Dublin 2, Ireland

5 <sup>2</sup>School of Psychology, Trinity College Dublin, Dublin 2, Ireland

6 <sup>3</sup>School of Electrical and Electronic Engineering and UCD Centre for Biomedical Engineering,  
7 University College Dublin, Belfield, Dublin 4, Ireland

8 \* Corresponding author: Elaine A Corbett ([corbette@ucd.ie](mailto:corbette@ucd.ie))

9 **Abstract** Perceptual decisions are biased toward higher-value options when overall gains can be  
10 improved. When stimuli demand immediate reactions, the neurophysiological decision process  
11 dynamically evolves through distinct phases of growing anticipation, detection and discrimination,  
12 but how value biases are exerted through these phases remains unknown. Here, by parsing motor  
13 preparation dynamics in human electrophysiology, we uncovered a multiphasic pattern of  
14 countervailing biases operating in speeded decisions. Anticipatory preparation of higher-value  
15 actions began earlier, conferring a “starting point”- advantage at stimulus onset, but the delayed  
16 preparation of lower-value actions was steeper, conferring a value-opposed buildup rate bias. This,  
17 in turn, was countered by a transient deflection toward the higher value action evoked by stimulus  
18 detection. A neurally-constrained process model featuring anticipatory urgency, biased detection,  
19 and accumulation of growing stimulus-discriminating evidence, successfully captured both behavior  
20 and motor preparation dynamics. Thus, an intricate interplay of distinct biasing mechanisms serves  
21 to prioritise time-constrained perceptual decisions.

## 22 Introduction

23 Perceptual decision making is generally well explained by a process whereby evidence is  
24 accumulated over time up to a bound that can trigger an action (Brown and Heathcote, 2008; Link  
25 and Heath, 1975; Ratcliff, 1978; Smith and Ratcliff, 2004; Usher and McClelland, 2001). In most  
26 models based on this principle, a given response time (RT) is made up of two temporal  
27 components, where the decision variable is either building at a stationary rate (“drift rate”)  
28 determined by a stable evidence representation, or is suspended, during “non-decision” delays  
29 associated with sensory encoding and motor execution. This simple scheme, developed primarily  
30 through the study of perceptual decisions with low to moderate speed pressure, affords two ways to  
31 explain how faster and more accurate responses are made to higher-value or more probable stimuli:  
32 through modulating the starting point or drift rate of the process (Blangero and Kelly, 2017; Feng et  
33 al., 2009; Leite and Ratcliff, 2011; Mulder et al., 2012; Ratcliff and McKoon, 2008; Simen et al.,  
34 2009; Summerfield and Koechlin, 2010; Urai et al., 2019; Voss et al., 2004; White and Poldrack,  
35 2014). Corresponding adjustments have been reported in neurophysiological recordings from  
36 motor-related areas of the brain (de Lange et al., 2013; Hanks et al., 2011; Rorie et al., 2010).  
37 However, recent work has highlighted additional dynamic elements of the decision process whose  
38 contributions to choice performance are likely to be accentuated when stimuli require immediate  
39 action.

40 First, when stimulus onset is predictable, anticipatory activity in motor preparation regions can begin  
41 to forge a decision even before the stimulus appears. While standard models do allow for  
42 anticipatory processing in the setting of the starting point from which the accumulator evolves after  
43 sensory encoding, neurophysiological data have revealed that anticipatory motor preparation is  
44 often dynamic, proceeding on a trajectory aimed at eventually crossing an action-triggering  
45 threshold by itself even in the absence of sensory input (Feuerriegel et al., 2021; Kelly et al., 2021;

46 Stanford et al., 2010). This represents a pre-stimulus signature of a signal identified in  
47 neurophysiology studies known as urgency—defined in accumulator models as an evidence-  
48 independent buildup component that continues to operate throughout the decision process, adding  
49 to sensory evidence accumulation so that the criterion amount of cumulative evidence to terminate  
50 the decision reduces with time (Churchland et al., 2008; Hanks et al., 2014; Murphy et al., 2016;  
51 Shinn et al., 2020; Steinemann et al., 2018; Thura and Cisek, 2014).

52 Second, for many suddenly-onsetting stimuli, sensory evidence of their distinguishing features  
53 emerges some time after the initial sensory neural response signalling their onset (Afacan-Seref et  
54 al., 2018; Smith and Ratcliff, 2009), meaning that detection precedes discrimination. In the case of  
55 the widely-studied random dot motion stimulus, recent work shows that behavior is well captured by  
56 a model in which accumulation begins at the onset of sensory encoding but where it takes a further  
57 400 ms approximately for the direction information to stabilise (Smith and Lilburn, 2020). In fact,  
58 serial detection and discrimination phases are reflected in human electrophysiological signatures of  
59 differential motor preparation during fast, value-biased decisions about other sensory features.  
60 Specifically, these signals show biased stimulus-evoked changes initially in the direction of higher  
61 value before being re-routed towards the correct sensory alternative (Afacan-Seref et al., 2018;  
62 Noorbaloochi et al., 2015), in line with previously proposed dual-phase models (Diederich and  
63 Busemeyer, 2006).

64 Thus, in time-pressured situations decision formation is not suspended until sensory  
65 representations stabilise, but rather proceeds through a concerted sequence of anticipatory,  
66 detection and discriminatory processing phases. Although previous work has established the  
67 potential importance of these individual phases (Afacan-Seref et al., 2018; Diederich and  
68 Busemeyer, 2006; Kelly et al., 2021; Noorbaloochi et al., 2015; Smith and Lilburn, 2020; Stanford et  
69 al., 2010), there exists no detailed computational account of how value-biased decision formation  
70 dynamics unfold through all three of them. In this study we used two complementary human  
71 electrophysiological signatures of motor preparation during performance of a sudden-onset random  
72 dot motion discrimination task under a tight deadline, to forge such an account.

73 We observed a complex pattern of distinct biases exerted across multiple phases including an initial  
74 anticipatory buildup in motor preparation for the high-value alternative, a later but steeper  
75 anticipatory buildup for the low-value alternative and then, immediately following stimulus onset, a  
76 further transient burst toward the high-value alternative. By incorporating urgency signal model  
77 components whose initial amplitude and buildup rate were constrained to match the corresponding  
78 measures of anticipatory motor preparation, we were able to adjudicate among several alternative  
79 multi-phase decision process models. We found that a model that featured 1) an initial, transient  
80 detection-triggered deflection toward the higher value alternative and 2) gradually-increasing  
81 discriminatory sensory evidence, best accounted for behavior, as well as recapitulating the fast  
82 dynamics of stimulus-evoked, differential motor preparation. Together, the findings show that, rather  
83 than simply enhancing all parameters of the decision process in favor of high-value alternatives, the  
84 neural decision architecture has the flexibility to apply biases in opposing directions to different  
85 process components, in a way that affords low-value decision signals the chance to “catch-up”  
86 when smaller rewards can be attained.

## 87 Results

88 **Behavior.** Participants performed fast-paced motion direction discrimination using the well-studied  
89 random dot kinematogram (RDK) stimulus (Roitman and Shadlen, 2002) with a preceding cue  
90 indicating the more valuable direction. We recorded scalp electroencephalography (EEG) from  
91 seventeen participants performing the task in three blocked regimes: high coherence with a very  
92 short deadline; low coherence with a slightly longer deadline; and the two coherences interleaved  
93 with the longer deadline (Figure 1A). These regimes were similarly challenging but in different ways,  
94 allowing us to further explore the extent to which the uncovered value biasing dynamics generalize

95 across task contexts where the demands are placed through lower discriminability versus through  
96 tight deadlines, and where stimulus discriminability is heterogeneous versus homogeneous (Hanks  
97 et al., 2011; Moran, 2015). In each trial, two colored arrows appeared prior to the stimulus onset,  
98 the colors of which indicated the respective value of a correct response in each of the two possible  
99 directions (left and right). After the onset of the stimulus, participants responded by clicking the  
100 mouse button corresponding to the chosen direction with their corresponding thumb. We imposed a  
101 single value differential (30 vs 10 points) that, combined with the deadline and coherence settings,  
102 induced a decision-making approach that was guided strongly by both sensory and value  
103 information. Correct responses between 100 ms after stimulus onset and the deadline resulted in  
104 the points associated with the color cue; otherwise, no points were earned. The value manipulation  
105 produced strong behavioral effects across all 4 conditions, though overall accuracy and RT varied  
106 (Figure 1B).

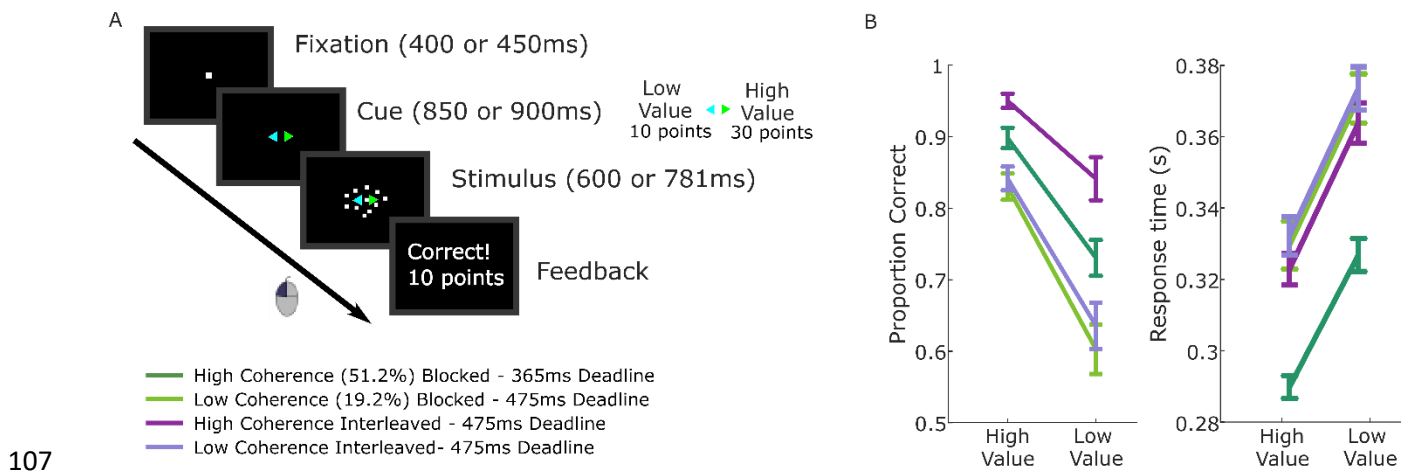

108 Figure 1: Value-cued motion direction discrimination task and behavioral data. A Trial structure with  
109 task conditions below. B Mean and standard error across participants ( $n=17$ ) for proportion correct  
110 and median RTs of correct responses. Repeated measures ANOVAs with fixed effects for task  
111 condition and value demonstrated that accuracy was higher for high-value trials than low-value trials  
112 ( $F(1,16)=60.8$ ,  $p<0.001$ , partial  $\eta^2=0.79$ ), and the median response times (RTs) for correct  
113 responses were shorter ( $F(1,16)=80.7$ ,  $p<0.001$ , partial  $\eta^2=0.84$ ). In addition to the large value  
114 effects, task condition affected accuracy ( $F(3,48)=60.2$ ,  $p<0.001$ , partial  $\eta^2=0.79$ ) and correct RTs  
115 ( $F(3,48)=38.1$ ,  $p<0.001$ , partial  $\eta^2=0.61$ ); the high coherence conditions were more accurate ( $p<.001$   
116 for blocked and interleaved) and the blocked high-coherence condition, with the shorter deadline,  
117 was the fastest ( $p<.001$  compared to other 3 conditions). Pairwise comparisons revealed no  
118 significant difference between the low-coherence conditions in correct RTs ( $p=0.6$ ;  $BF_{10}=0.28$ ).  
119 The low-coherence interleaved condition was slightly more accurate than the low coherence  
120 blocked condition but not significantly so, and the Bayes factor indicates the data contain insufficient  
121 evidence to draw definite conclusions ( $p=0.1$ ,  $BF_{10}=0.87$ ). The Condition  $\times$  Value interaction was  
122 significant for accuracy ( $F(3,48)=6.4$ ,  $p=0.001$ , partial  $\eta^2=0.29$ ) but not correct RTs ( $p=0.7$ ).

123 Our ultimate goal was to develop a model that could jointly explain the group-average EEG decision  
124 signals and behavior. Behavior was quantified in the RT distributions for correct and error  
125 responses in each stimulus and value condition, summarized in the 0.1, 0.3, 0.5, 0.7 and 0.9  
126 quantiles (Ratcliff and Tuerlinckx, 2002). Following the analysis of Smith & Corbett (2019), we  
127 verified that the individual RT quantiles could be safely averaged across participants without  
128 causing distortion by plotting the quantiles of the marginal RT distributions for the individual  
129 participants against the group-averaged quantiles, for each of the 8 conditions (Figure 1-Figure  
130 Supplement 1). The quantiles of the individual distributions were seen to fall on a set of very straight  
131 lines, indicating that the quantile-averaged distribution belongs to the same family as the set of its  
132 component distributions (Smith and Corbett, 2019), thus approximating the conditions for safe  
133 quantile-averaging identified by Thomas and Ross (1980). We calculated the Pearson correlations

134 between each individual's quantiles and the group average with that individual excluded, for each  
135 condition (see Figure 1-Figure Supplement 2), finding that the lowest  $r^2$  was 0.965 while most  
136 values were above 0.99. These analyses indicate that quantile-averaging will produce a valid  
137 characterization of the pattern of behavioral data in the individuals.

138 **EEG Signatures of Motor Preparation.** Decreases in spectral amplitude in the beta band  
139 (integrated over 14-30Hz) over motor cortex reliably occur with the preparation and execution of  
140 movement (Pfurtscheller, 1981). When the alternative responses in a decision task correspond to  
141 movements of the left and right hands, the signal located contralateral to each hand leading up to  
142 the response appears to reflect effector-selective motor preparation that is predictive of choice  
143 (Donner et al., 2009). Furthermore, before the onset of sensory evidence the 'starting levels' of the  
144 signals reflect biased motor preparation when prior expectations are biased (de Lange et al., 2013),  
145 and are higher under speed pressure for both alternatives (Kelly et al., 2021; Murphy et al., 2016;  
146 Steinemann et al., 2018), implementing the well-established decision variable (DV) adjustments  
147 assumed in models (Bogacz et al., 2010; Hanks et al., 2014; Mulder et al., 2012). The signal  
148 contralateral to the chosen hand then reaches a highly similar level at response irrespective of  
149 stimulus conditions or response time, consistent with a fixed, action-triggering threshold (Devine et  
150 al., 2019; Feuerriegel et al., 2021; Kelly et al., 2021; O'Connell et al., 2012; Steinemann et al.,  
151 2018). The level of beta before stimulus onset also predicts response time, and its post-stimulus  
152 buildup rate scales with evidence strength, underlining that this signal reflects both evidence-  
153 independent and evidence-dependent contributions to the decision process (Steinemann et al.,  
154 2018). Thus, we can interpret the left- and right-hemisphere beta as reflecting two race-to-threshold  
155 motor-preparation signals whose buildup trace the evolution of the decision process from stimulus  
156 anticipation through to the response (Devine et al., 2019; Kelly et al., 2021; O'Connell et al., 2012).

157 Here, prior to stimulus onset, motor preparation (decrease in beta amplitude) began to build in  
158 response to the value cue, first for the high-value alternative and later for the low-value alternative  
159 ( $F(1,16)=15.8$ ,  $p=.001$ , partial  $\eta^2=0.5$  for jackknifed onsets, Figure 2A), and continued to build for  
160 both alternatives after stimulus onset. Consistent with prior work suggesting an action-triggering  
161 threshold, the signal contralateral to the chosen hand reached a highly similar level at response  
162 irrespective of cue-type, coherence or regime (Figure 2B). Before the stimulus onset, rather than  
163 generating a stable starting level bias the motor preparation signals continued to increase  
164 dynamically. This replicates similar anticipatory buildup observed in a previous experiment with prior  
165 probability cues, and does not reflect an automatic priming due to the cue because its dynamics  
166 vary strategically with task demands such as speed pressure (Kelly et al., 2021). Thus, we take the  
167 anticipatory buildup to reflect dynamic urgency that, independent of but in addition to the evidence,  
168 drives the signals towards the threshold (Churchland et al., 2008; Hanks et al., 2014; Murphy et al.,  
169 2016; Steinemann et al., 2018; Thura and Cisek, 2014).

170 We examined this anticipatory activity for evidence of value bias in the period immediately before  
171 stimulus onset (Figure 2A). Preparation for the high-value alternative was greater than that for the  
172 low-value alternative 750ms after the cue ( $F(1,16)=17.6$ ,  $p<.001$ , partial  $\eta^2=0.52$ ). However, despite  
173 their later onset, the buildup rates of motor preparation signals for the low-value alternative were  
174 significantly steeper (slope from 700-800 ms,  $F(1,16)=14.7$ ,  $p=.001$ , partial  $\eta^2=.48$ ), indicating a  
175 negative buildup-rate bias. These beta slopes for the high and low-value alternatives, averaged  
176 across conditions, are shown for each individual in Figure 2-Figure Supplement 1. Despite absolute  
177 levels of beta amplitude varying quite widely across the group, as is typical in human EEG, the  
178 majority of individuals (14 out of 17) show steeper buildup for the low-value alternative. As a  
179 consequence of these differences in onset and buildup rate, the bias in relative motor preparation  
180 favouring the high-value cue peaked at around 600 ms post-cue and then began to decline before  
181 stimulus onset (Figure 2C).

182 Next, to trace the rapid stimulus-evoked dynamics of the decision process with higher temporal  
183 resolution, we examined the broadband lateralized readiness potential (LRP). This differential signal  
184 represents the relative motor preparation dynamics between the hands associated with the correct

185 and error responses (Afacan-Seref et al., 2018; Gluth et al., 2013; Gratton et al., 1988;  
186 Noorbaloochi et al., 2015; Van Vugt et al., 2014), here examined relative to a peri-stimulus baseline  
187 interval (-50-50 ms) in order to emphasize fast stimulus-evoked dynamics (Figure 2D; see also  
188 Figure 2-Figure Supplement 2 for an analysis of the pre-stimulus LRP). Beginning approximately  
189 100 ms after the stimulus, there was a deflection in the direction of the cued choice (in the correct  
190 direction for high-value trials and incorrect direction for low-value trials,  $F(1,16)=20.3$ ,  $p<.001$ , partial  
191  $\eta^2=.56$ , effect of value on the mean LRP from 150-180 ms, Figure 2D). We refer to this initial  
192 deflection as a “bolus,” following a similar finding by Noorbaloochi et al., (2015). The sensory  
193 evidence appears to begin to affect motor preparation at around 150 ms when the LRP for the low-  
194 value trials begins to turn around and build in the correct direction.

195 Together these signals indicate that motor preparation passed through several key phases.  
196 Anticipatory buildup began first for the high-value alternative, followed by low-value preparation  
197 which, beginning to compensate for its lower level, reached a higher buildup rate before stimulus  
198 onset, constituting a negative buildup-rate bias. Then, stimulus onset evoked a brief value-biased  
199 deflection, consistent with a positive drift-rate bias effect, before giving way to a final phase  
200 dominated by discriminatory sensory information.

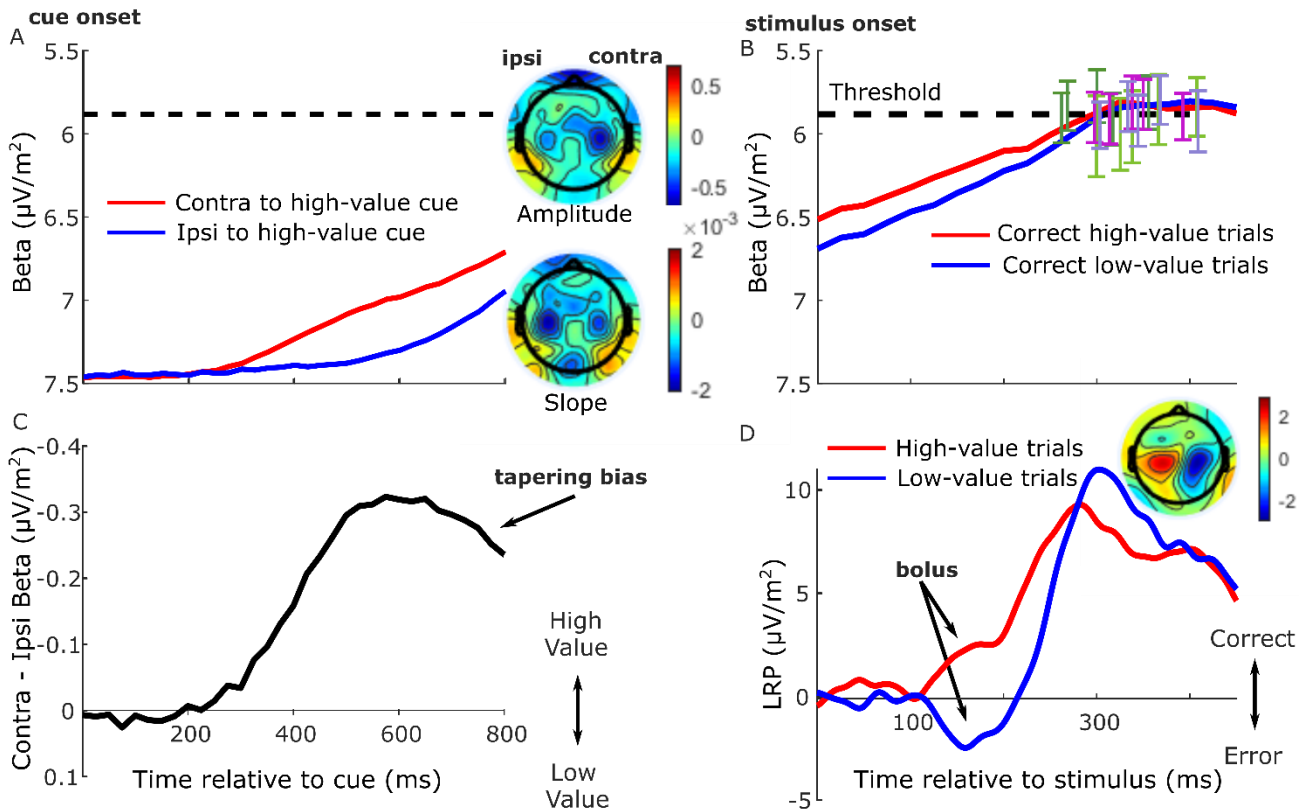

201

202 Figure 2: Grand average ( $n=17$ ) EEG signatures of motor preparation. A Unilateral beta amplitude,  
203 contralateral to high- and low-value alternatives in the period after the cue and before the motion  
204 stimulus appeared at 850 or 900 ms; Note that the Y-axis is flipped such that decreasing amplitude  
205 (increasing motor preparation) is upwards. Topographies are for left-cued trials averaged with the  
206 right-left flipped topography for right-cued trials, so that the right side of the head-plot represents the  
207 hemisphere contralateral to the high-value side. Amplitude topography reflects beta amplitude at  
208 750 ms relative to amplitude at cue onset, and slope is measured from 700-800 ms. B Beta  
209 amplitude contralateral to response for correct trials only, relative to stimulus onset. Error bars are  
210 the standard errors of amplitudes 50 ms before response, with between-subject variability factored  
211 out, plotted against RT. Trials were separated by session and coherence, showing high- and low-  
212 value correct trials median-split by RT and low-value error trials. C Relative motor preparation (the  
213 difference between the waveforms in panel A), highlighting the pre-stimulus decline due to steeper

214 low-value urgency. D LRP: ipsilateral - contralateral to correct response calculated at standard sites  
215 C3/C4, so that deflection upward corresponds to relative motor preparation in the correct direction.  
216 LRP waveforms were baseline corrected with respect to the interval -50-50 ms to focus on local  
217 stimulus-evoked dynamics. Topography shows the difference in amplitude between left- and right-  
218 cued trials at 150-180 ms relative to baseline. All waveforms derived from all trials regardless of  
219 accuracy unless otherwise stated.

220 **Model Development.** We next sought to construct a decision process model that can capture both  
221 behavior and the motor preparation dynamics described above. Probably the most widely-used  
222 evidence-accumulation model for two-alternative decision making is the diffusion decision model  
223 (DDM, Ratcliff, 1978), which describes a one-dimensional stationary evidence accumulation process  
224 beginning somewhere between two decision bounds and ending when one of the bounds is  
225 crossed, triggering the associated response action. The time this process takes is known as the  
226 *decision time*, which is added to a *nondecision time* (accounting for sensory encoding and motor  
227 execution times) to produce the final RT. This model has been successfully fit to the quantiles of RT  
228 distributions (e.g. Figure 1-Figure Supplement 1) for correct and error responses across a wide  
229 range of perceptual decision contexts. Traditionally, value biases can be incorporated into this  
230 framework by either biasing the starting point closer to one bound than the other or biasing the rate  
231 of evidence accumulation, the former of which generally better describes behavior (Ratcliff and  
232 McKoon, 2008). However, researchers have found that when there is a need to respond quickly, a  
233 stationary evidence accumulation model is not sufficient to capture the pattern of value biases in  
234 behavior, which exhibits a dynamic transition from early, value-driven responses to later evidence-  
235 based ones. Accounting for this fast value-biased behavior in a DDM framework has instead  
236 required a non-stationary drift rate; either a dual phase model with an initial value-based drift rate  
237 transitioning to a later evidence-based one (Diederich and Busemeyer, 2006), or combining a  
238 constant drift rate bias with a gradually increasing sensory evidence function (Afacan-Seref et al.,  
239 2018). Alternatively, Noorbalooshi et al (2015) proposed a linear ballistic accumulator model with a  
240 probabilistic fast guess component that was driven by the value information. However, in each of  
241 these approaches evidence accumulation begins from a stable starting point, meaning they could  
242 not account for the dynamic biased anticipatory motor preparation activity.

243 Combined urgency + evidence-accumulation model: As noted above, we interpreted the anticipatory  
244 beta changes to be reflective of a dynamic urgency driving the motor preparation for each  
245 alternative towards its threshold, independent of sensory evidence. Urgency has been found to be  
246 necessary to explain the more symmetrical RT distributions found in many speed-pressured tasks,  
247 as well as the sometimes-strong decline in accuracy for longer RTs in these conditions. Urgency  
248 has been implemented computationally in a variety of ways, reviewed in detail by Smith & Ratcliff  
249 (2021) and Trueblood et al. (2021). While models assuming little or no accumulation over time  
250 characterize urgency as a “gain” function that multiplies the momentary evidence, models centered  
251 on evidence accumulation assume that urgency adds to cumulative evidence in a DV with a fixed  
252 threshold, which is mathematically equivalent to a bound on cumulative evidence that collapses  
253 over time (Drugowitsch et al., 2012; Evans et al., 2020; Hawkins et al., 2015; Malhotra et al.,  
254 2017). The latter, additive urgency implementation is consistent with neurophysiological signatures  
255 of urgency found across multiple evidence strengths including zero-mean evidence (Churchland et  
256 al., 2008; Hanks et al., 2011) and provides the most natural interpretation of the beta signals here  
257 due to their anticipatory, pre-stimulus buildup before evidence accumulation was possible. We  
258 therefore drew on a recently proposed model for decisions biased by prior expectations with two  
259 discrete levels: the one-dimensional accumulation of stimulus-evoked activity (noisy sensory  
260 evidence and bias) is fed to a ‘motor’ level where it is combined additively with evidence-  
261 independent buildup components that linearly increase with time (Murphy et al., 2016; Steinemann  
262 et al., 2018) to generate the motor-level DVs engaging in a race to the bound (Kelly et al., 2021,  
263 Figure 3A).

264 Distinct pre-stimulus starting levels were set for the DV contralateral (parameter  $Z_c$ ) and ipsilateral  
265 ( $Z_i$ ) to the direction of the value cue for each regime. Extrapolating from the anticipatory motor

266 preparation buildup, we assumed the operation of linearly-increasing urgency, which was also  
267 biased by the value cue. The urgency buildup rates varied from trial to trial independently for the two  
268 response alternatives, in a Gaussian distribution with means  $U_{c,i}$  and standard deviation  $s_u$ . We  
269 assume in all models that the accumulation process takes an additive combination of noisy stimulus  
270 evidence plus a stimulus-evoked bias, both of which are implemented in alternative ways for  
271 comparison as detailed below. We refer to that combination as the "cumulative evidence plus bias"  
272 function,  $x(t)$ . The DVs were then generated by adding the cumulative evidence plus bias in favor  
273 of either alternative to the corresponding motor-level urgency signal, triggering a decision at the  
274 "decision time" when the first reached the bound:

$$DV_1(t) = m_1(t) + [x(t)] \quad (1)$$

$$DV_2(t) = m_2(t) + [-x(t)] \quad (2)$$

275 Here  $DV_1$  and  $DV_2$  represent the DVs for the correct and incorrect responses respectively, which  
276 were updated in our simulations at a time interval  $dt = 1$  ms.  $m_1$  and  $m_2$  represent the motor-level  
277 urgency contributions contralateral and ipsilateral to the cued direction on high-value trials, and the  
278 reverse on low-value trials. The motor level contribution was defined as:

$$m_1(t) = z_1 + u_1 \cdot (t - T_z) \quad (3)$$

$$m_2(t) = z_2 + u_2 \cdot (t - T_z) \quad (4)$$

279  $z_1$  and  $z_2$  represent the starting levels for the DVs at pre-stimulus time,  $T_z$ , at which the starting  
280 beta levels are measured; and  $u_1$  and  $u_2$  represent the urgency rates for the two alternatives on that  
281 trial. For example, in a high-value trial (in which the cued direction is the correct response):

$$u_1 \sim N(U_c, s_u); z_1 = Z_c, \text{ and} \quad (5)$$

$$u_2 \sim N(U_i, s_u); z_2 = Z_i. \quad (6)$$

282 The cumulative evidence plus bias,  $x(t)$  is positive in the direction of the correct response, and the  
283 half-wave rectification operation,  $[x] = \max(0, x)$ , apportions the positive and negative components  
284 to the appropriate DVs. All the above equations are defined for the time following  $T_z$ .

285 The trial RT was obtained by adding to the decision time a *motor execution time*; this varied from  
286 trial to trial on a uniform distribution with mean  $T_r$  which varied between the regimes, and range  $s_r$ .  
287 Allowing for regime differences in motor execution was important as its timing is known to be  
288 affected by speed/accuracy settings (Kelly et al., 2021; Rinkenauer et al., 2004; Weindel et al.,  
289 2021). In previous work we had constrained the mean motor-execution time parameter using an  
290 EEG motor-evoked potential (Kelly et al., 2021). However, likely due to the substantially increased  
291 model constraints in the current study (see Neural Constraints section below), we found in  
292 preliminary analyses that constraining the motor-execution times in this way was detrimental to our  
293 fits. The cumulative evidence plus bias function was initiated at the time of stimulus onset  $x(0) = 0$ ,  
294 and updated according to the following equation:

$$x(t) = x(t - dt) + B(t).dt + \mu(t).dt + w(t).\sqrt{dt} \quad (7)$$

295 Here  $B(t)$  represents the stimulus evoked bias,  $\mu(t)$  is the drift rate of the evidence. The within-trial  
 296 noise,  $w(t)$ , is Gaussian-distributed with standard deviation  $\sigma(t)$ :

$$w(t) \sim N(0, \sigma(t)). \quad (8)$$

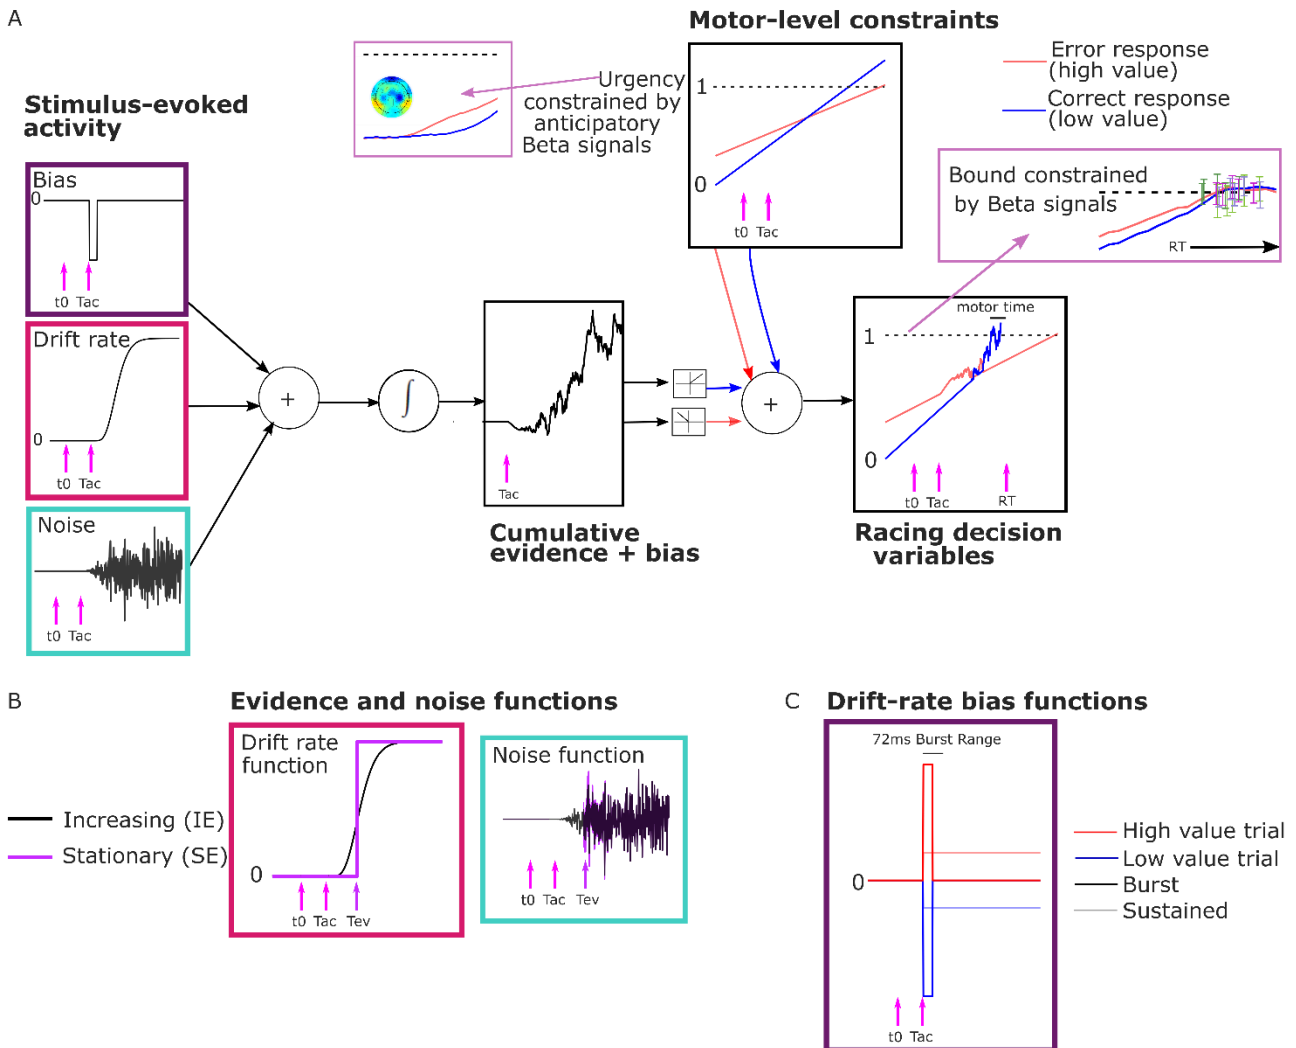

297

298 Figure 3 Model Schematic. A Components of the model with a transient burst of stimulus-evoked  
 299 bias and increasing evidence ('BurstIE'), with example traces for the cumulative sum of evidence  
 300 plus bias, urgency and the resultant motor-level DV traces from a simulated low-value trial. A delay  
 301  $T_{ac}$  after stimulus onset,  $t_0$ , the combination of a sudden detection-triggered bias function and  
 302 growing, noisy sensory evidence began to be accumulated, and with the addition of urgency drove  
 303 the race between two DVs toward the threshold. The cumulative evidence plus bias was half-wave  
 304 rectified such that (positive) evidence towards the correct (low-value) response was added to the  
 305 low-value urgency signal, and vice versa. B Alternative evidence and noise functions. For SE  
 306 models both stepped abruptly to their asymptotic value whereas for IE models both increased  
 307 according to a gamma function. C Alternative drift-rate bias functions. For 'Burst' models the



308 duration of bias was short, with a maximum of 72 ms, whereas sustained drift-rate bias ('Sust')  
 309 models had a bias that continued throughout the trial. Waveforms are not drawn to scale.

310 Neural Constraints: Based on the principle that neural constraints permit greater model complexity  
 311 without unduly increasing degrees of freedom (O'Connell et al., 2018), from the anticipatory motor  
 312 preparation signals we adopted constraints on not just starting levels (Kelly et al., 2021) but also the  
 313 biased mean urgency buildup rates. The mean beta starting levels (750 ms post cue) and slopes  
 314 (from 700-800 ms post-cue) were calculated for each regime across participants. To obtain the  
 315 model parameters, we linearly re-scaled the beta signals within a range from 0, corresponding to  
 316 the lowest starting level, to a fixed bound of 1 corresponding to the beta threshold—the average  
 317 value of beta contralateral to the chosen hand across all conditions 50 ms prior to response (see  
 318 Figure 4A). The setting of the bound at 1 was an arbitrary choice and serves as the scaling  
 319 parameter for the model. The starting levels and mean rates of urgency buildup for the high and  
 320 low-value alternatives were set to equal the amplitude and temporal slope of the corresponding  
 321 scaled beta signals for each regime (Table 1).

322 Table 1: EEG-constrained parameters.

| Parameter                                     | Symbol | High Coherence | Low Coherence | Interleaved |
|-----------------------------------------------|--------|----------------|---------------|-------------|
| Starting point contralateral to high value    | $Z_c$  | .33            | .3            | .2          |
| Starting point ipsilateral to high value      | $Z_i$  | .14            | .003          | 0           |
| Mean urgency rate contralateral to high value | $U_c$  | 1.33           | 1.06          | 1.26        |
| Mean urgency rate ipsilateral to high value   | $U_i$  | 1.78           | 1.66          | 1.76        |

323  
 324 Within this neurally-constrained urgency model framework, we fit several alternative bounded  
 325 accumulation models to the data for comparison. Specifically, we explored whether the data were  
 326 better captured by a stationary (Ratcliff and McKoon, 2008) or growing (Afacan-Seref et al., 2018;  
 327 Smith and Lilburn, 2020) evidence function, and by a sustained (Afacan-Seref et al., 2018) or  
 328 transient (Diederich and Busemeyer, 2006) drift-rate bias, by comparing four main model variants  
 329 that featured two plausible alternative ways to implement noisy evidence accumulation and two  
 330 different stimulus-evoked biasing mechanisms:

331 Evidence and noise functions: We compared models with a standard *stationary evidence* (SE)  
 332 function with abrupt onset to *increasing evidence* (IE) models where the evidence and noise  
 333 gradually grow with time (Smith et al., 2014; Smith and Lilburn, 2020) (Figure 3B). Both model types  
 334 had an asymptotic drift rate parameter,  $v$ , to which the mean of the sensory evidence stepped (SE)  
 335 or gradually tended (IE), for each coherence level. A single within-trial noise parameter ( $s$ ) dictated  
 336 the asymptotic standard deviation of Gaussian-distributed within-trial noise. We also estimated an  
 337 onset time for accumulation,  $T_{ac}$ , relative to stimulus onset. In the SE models this parameter  
 338 signalled the onset of the bias accumulation (see below), while the noisy evidence stepped up at a  
 339 later time,  $T_{ev}$ .

$$\mu_{SE}(t) = \begin{cases} v & \text{if } t > T_{ev} \\ 0 & \text{otherwise} \end{cases} \quad (9)$$

$$\sigma_{SE}(t) = \begin{cases} s & \text{if } t > T_{ev} \\ 0 & \text{otherwise} \end{cases} \quad (10)$$

340 In the IE models, the bias, evidence, and noise functions all began at  $T_{ac}$ . The increasing evidence  
 341 and noise functions used were those developed for a time-changed diffusion model (Smith et al.,  
 342 2014; Smith and Lilburn, 2020) in which the drift rate  $v$ , and diffusion coefficient  $s^2$  (the squared

343 standard deviation of the Gaussian-distributed within-trial noise), are both scaled by a growth rate  
344 function  $\vartheta$ :

$$\mu_{IE}(t) = v \cdot \vartheta(t) \quad (11)$$

$$\sigma_{IE}(t) = s \cdot \sqrt{\vartheta(t)} \quad (12)$$

345 Following Smith and Lilburn (2020, see equation 9),  $\vartheta$  took the form of an incomplete gamma  
346 function with rate  $\beta$ , where the argument  $n$  and  $\beta$  were free parameters:

347

$$\vartheta(t) = \begin{cases} \frac{1}{\Gamma(n)} \int_0^{\beta(t-T_{ac})} e^{-r} r^{n-1} dr, & \text{if } t > T_{ac} \\ 0, & \text{otherwise} \end{cases} \quad (13)$$

348

349 In this equation  $\Gamma(n)$  is the gamma function. The shape of the function obtained by one of our  
350 model fits is shown in Figure 3B.

351 Stimulus-evoked bias functions: We also compared two alternative implementations of a drift-rate  
352 bias across different model variants. One featured a sustained drift-rate bias ('Sust') which began at  
353  $T_{ac}$  and lasted until response. The other featured a shorter transient bias, inspired by the apparent  
354 concentrated burst of value-biased activity ('Burst') before evidence accumulation took hold in the  
355 LRP (Figure 3C). Both functions involved a bias magnitude parameter ( $v_b$ ) for each regime:

$$B_{Sust}(t) = \begin{cases} \pm v_b, & \text{if } t \geq T_{ac} \\ 0, & \text{otherwise} \end{cases} \quad (14)$$

$$B_{Burst}(t) = \begin{cases} \pm v_b, & \text{if } T_{ac} \leq t \leq (T_{ac} + BurstT) \\ 0, & \text{otherwise} \end{cases} \quad (15)$$

356 The bias factor  $\pm v_b$  was positive for high-value trials and negative for low-value trials. The 'Burst'  
357 was composed of a drift-rate bias beginning at  $T_{ac}$  whose duration  $BurstT$  varied on a uniform  
358 distribution from 0-72ms. In preliminary analyses we found that the burst magnitude and its range of  
359 durations could trade off each other such that equivalent fits to behavior could be found for a wide  
360 range of values of the latter. We thus fixed the maximum duration to 72 ms because it produced a  
361 simulated-DV bolus similar in duration to the real LRP (Figure 4 B,C; see Methods). We also  
362 restricted  $T_{ac}$  to a narrow range of 90-100 ms in the fits, close to the apparent onset of the real LRP  
363 bolus; we did not find that expanding this range helped the models to converge.

364 **Model Fits.** Models were fit to the group average of the RT quantiles (see Methods). We did not fit  
365 the models to individual subjects because, in contrast to models solely fit to behavior where each  
366 individual's data can be taken as an accurate reflection of the outcomes of their true individual  
367 decision process, our neurally-constrained models constrain certain key parameters to equal EEG  
368 beta-amplitude measures. These EEG measures are much less reliable on an individual-subject  
369 level, where it is not unusual to have certain individuals showing no signal at all due to factors  
370 independent of the decision process such as brain geometry. We therefore conduct the modeling on  
371 a grand-average level because grand-average beta-amplitude dynamics are much more robust.

372 The increasing-evidence (IE) models performed better than the stationary-evidence (SE) models,  
373 with the BurstIE model providing the best fit to behavior (Table 2). This model captured all the main  
374 qualitative features of the RT distributions, including the indistinguishable (value-driven) leading  
375 edges of correct high-value and incorrect low-value trials (Figure 4 D-E), and the transition from  
376 value-based to evidence-based responses visible in the low-value conditional accuracy functions  
377 (CAFs, Figure 4F). Although the SustIE, BurstSE and SustSE models exhibited a less close  
378 quantitative fit to behavior as reflected in Akaike's Information Criterion (AIC) and Akaike weights  
379 (W), qualitatively, they all captured the main behavioral patterns reasonably well including the  
380 biased fast guess responses (Figure 4-Figure Supplements 1-3). The estimated parameters for  
381 these four primary models are given in Table 3.

382 We tested four additional versions of the IE model to assess the contribution of the constrained  
383 urgency and stimulus-evoked bias to the fits (Table 2). First, allowing the urgency rates to be free  
384 parameters, but unbiased by value (Kelly et al., 2021), did not capture the behavior as well as the  
385 constrained BurstIE model. Then, a model with constrained urgency but no stimulus-evoked bias  
386 produced a far inferior fit. These results suggest that in addition to accounting for the slow temporal  
387 integration properties of sensory evidence encoding, incorporating both key insights gained from the  
388 EEG signals was important in capturing behavior. We then verified the specific contribution of  
389 quantitative differences across regimes in the urgency effects measured in the beta signals by  
390 showing that swapping the neural constraints across regimes substantially worsened the fit.

391 To serve as a benchmark, we also fit the diffusion decision model (DDM), with stationary evidence  
392 accumulation and allowing for bias only in the starting point of evidence accumulation (Ratcliff and  
393 McKoon, 2008), whose performance was markedly worse than all of the neurally-constrained  
394 alternatives. Indeed, this poor performance was expected given there are substantive qualitative  
395 features of the data that the DDM is not equipped to capture, such as the value-driven leading edge,  
396 the fast transition from value- to evidence-based responses, and the symmetric RT distributions as  
397 has been established before (Afacan-Seref et al., 2018; Diederich and Busemeyer, 2006; Kelly et  
398 al., 2021). The estimated parameters for the DDM are given in Table 4.

399 Finally, in the last 7 rows of Table 2 we report the performance of selected neurally-constrained  
400 models that incorporate additional parameters which were included in a neurally-constrained model  
401 from previous work (Kelly et al., 2021) but had little effect here. First, a central finding from (Kelly et  
402 al., 2021), which involved an extreme speed-pressure manipulation, was that the drift rate  
403 parameter increased under speed pressure for the same stimulus coherence. Thus, the: "BurstIE +  
404 drift boost" model allowed an additional drift boost parameter in the high coherence blocked  
405 condition, relative to the high-coherence interleaved condition. This resulted in an almost identical  
406  $G^2$ , suggesting that in this case the much more subtle speed pressure manipulation between the  
407 conditions was not sufficient to replicate the effect. Second, their model had a uniformly distributed  
408 starting-level variability with a range parameter,  $s_z$ , applied independently to the constrained mean  
409 starting levels of the DVs. This parameter did not improve our fits to any of the four neurally-  
410 constrained models (listed in rows 11-14). Third, it was possible that the effect of the gradual  
411 integration of motion evidence could be captured in the SE models by allowing for variability in the  
412 evidence onset time,  $T_{ev}$ . Whereas Kelly et al., (2021) incorporated variability in accumulation onset  
413 relative to a fixed evidence onset time, it was more convenient here to incorporate a qualitatively  
414 similar feature by varying evidence onset, since accumulation onset was anchored to the onset of  
415 the LRP bolus response. We found that adding such variability, uniformly distributed with range  
416  $s_{Tev}$ , very slightly improved performance of the BurstSE model and did not help the SustSE model.  
417 Neither were improved to an extent where they could compete with the best-fitting BurstIE model.

418

419

420

421 Table 2. Goodness of fit metrics.

| Model                      | Stimulus-evoked bias | Evidence   | k  | G <sup>2</sup> | AIC | W     |
|----------------------------|----------------------|------------|----|----------------|-----|-------|
| BurstIE                    | Burst                | Increasing | 14 | 43             | 71  | .47   |
| SustIE                     | Sustained            | Increasing | 14 | 60             | 88  | .0001 |
| BurstSE                    | Burst                | Stationary | 13 | 69             | 95  | 0     |
| SustSE                     | Sustained            | Stationary | 13 | 89             | 115 | 0     |
| Unbiased urgency slopes    | Burst                | Increasing | 17 | 54             | 88  | .0001 |
| Urgency-only bias          | None                 | Increasing | 11 | 362            | 384 | 0     |
| DDM                        | None                 | Stationary | 14 | 606            | 634 | 0     |
| Constraints-Swap 1         | Burst                | Increasing | 14 | 272            | 300 | 0     |
| Constraints-Swap 2         | Burst                | Increasing | 14 | 122            | 150 | 0     |
| BurstIE + drift boost      | Burst                | Increasing | 15 | 42             | 72  | .22   |
| BurstIE + s <sub>Z</sub>   | Burst                | Increasing | 15 | 42             | 72  | .31   |
| SustIE + s <sub>Z</sub>    | Sustained            | Increasing | 15 | 59             | 89  | 0     |
| BurstSE + s <sub>Z</sub>   | Burst                | Stationary | 14 | 69             | 97  | 0     |
| SustSE + s <sub>Z</sub>    | Sustained            | Stationary | 14 | 92             | 120 | 0     |
| BurstSE + sT <sub>ev</sub> | Burst                | Stationary | 14 | 64             | 92  | 0     |
| SustSE + sT <sub>ev</sub>  | Sustained            | Stationary | 14 | 92             | 120 | 0     |

422 Goodness of fit quantified by chi-squared statistic, G<sup>2</sup>. Model comparison was performed using  
 423 Akaike's Information Criterion (AIC), which penalises for the number of free parameters (k). The  
 424 Akaike Weights (W) shown, which can be cautiously interpreted as the probability that each model  
 425 is the best in the set, are calculated here based on the set of models in this table. The probability  
 426 mass is shared between the different versions of the BurstIE model. In the two Constraints-Swap  
 427 models, the constrained parameters for A) high coherence, B) low coherence and C) interleaved  
 428 blocks were taken from the neural signals corresponding to [B,C,A] (Swap 1) and [C,A,B] (Swap 2),  
 429 respectively.

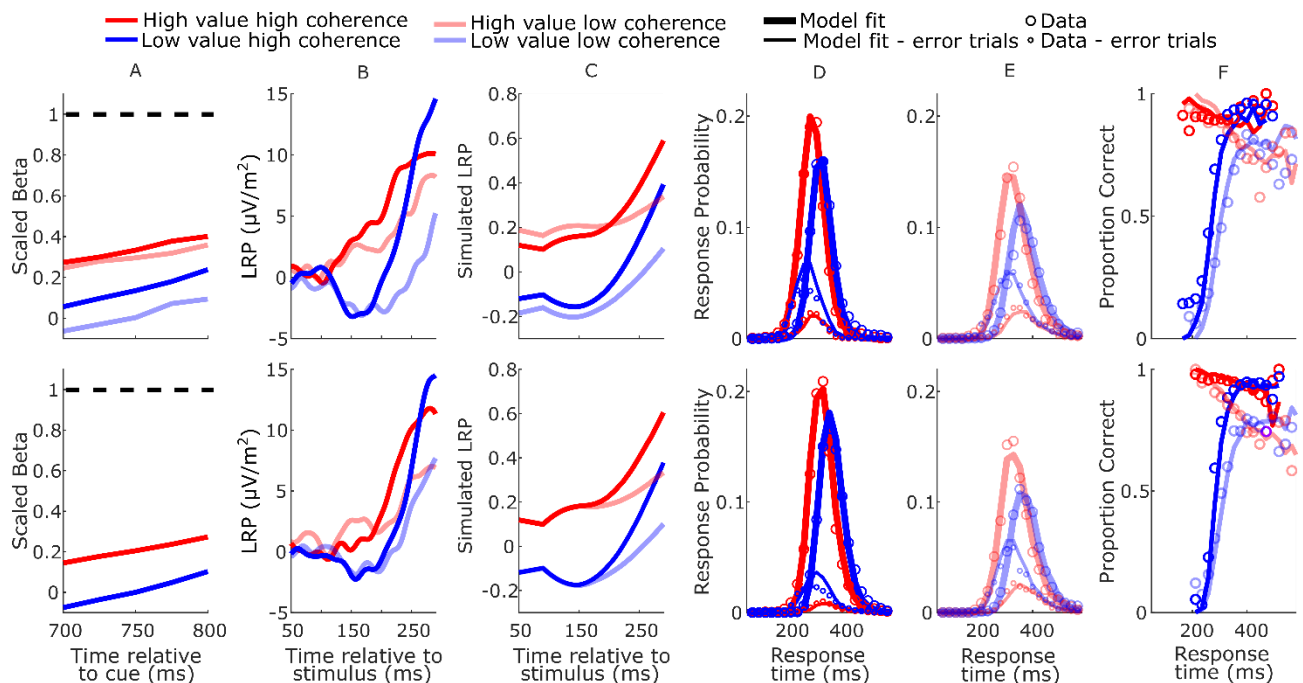

430  
 431 Figure 4: Real and model-simulated waveforms and behavior for blocked session (top row) and  
 432 interleaved session (bottom row). A Scaled beta signals used to constrain the models. The high  
 433 versus low-value difference in starting level varied across regime (Regime x Value interaction  
 434  $F(2,32)=4.1$ ,  $p=.03$ , partial  $\eta^2=.84$ ; pairwise comparisons of value-difference indicated low  
 435 coherence blocked > high coherence blocked,  $p=0.01$ ). The Regime x Value interaction for slope  
 436 was not statistically significant ( $F(2,32)=0.11$ ,  $p=.89$ , partial  $\eta^2=.96$ ); B Real LRP. There was a

437 significant interaction in bolus amplitude (mean LRP from 150-180 ms) between Value and  
 438 Condition ( $F(3,48)=2.9$ ,  $p=.04$ , partial  $\eta^2=.16$ ). Pairwise comparisons of the value difference  
 439 provided moderate evidence that the blocked high-coherence condition had a larger difference than  
 440 the interleaved high-coherence condition ( $p=0.09$ ,  $BF_{10} = 3.87$ ); there were no significant  
 441 differences between the other conditions (all  $p>0.23$ ). C Mean simulated trajectories of the  
 442 difference between correct and incorrect DVs from the best-fitting model with Burst drift-rate bias  
 443 and increasing evidence (BurstIE); D-E Real (circles) and model-simulated (solid lines) RT  
 444 distributions. F Real and model-simulated conditional accuracy functions (CAFs). All waveforms  
 445 derived from all trials regardless of accuracy.

446 Table 3: Estimated parameters for the four main models.

| Parameter                                        | Symbol      | BurstIE   | SustIE | BurstSE   | SustSE |
|--------------------------------------------------|-------------|-----------|--------|-----------|--------|
| Asymptotic drift rate (high coherence)           | $v_h$       | 6.4       | 8.4    | 4.9       | 4.6    |
| Asymptotic drift rate (low coherence)            | $v_l$       | 2.8       | 3.3    | 2.1       | 2.1    |
| Drift rate bias (high coherence blocked)         | $v_{bh}$    | 2.4       | .63    | 2.3       | 0.51   |
| Drift rate bias (low coherence blocked)          | $v_{bl}$    | 2.3       | .49    | 2.4       | 0.46   |
| Drift rate bias (interleaved)                    | $v_{bi}$    | 3.1       | .74    | 3.1       | 0.63   |
| Within-trial noise asymptotic standard deviation | $s$         | 1.13      | 1.16   | 0.93      | 0.81   |
| Accumulation onset time (ms)                     | $T_{ac}$    | 90        | 90     | 91        | 91     |
| Burst duration range (ms)                        | $b_{range}$ | <b>72</b> | ---    | <b>72</b> | ---    |
| $\vartheta(t)$ – rate                            | $\beta$     | 54.9      | 41.4   | ---       | ---    |
| $\vartheta(t)$ – argument                        | $n$         | 6.9       | 6.7    | ---       | ---    |
| Evidence onset time (ms)                         | $T_{ev}$    | ---       | ---    | 205       | 223    |
| Mean motor time (high coherence blocked) (ms)    | $T_{rh}$    | 86        | 72     | 73        | 57     |
| Mean motor time (low coherence blocked) (ms)     | $T_{rl}$    | 85        | 67     | 74        | 54     |
| Mean motor time (interleaved) (ms)               | $T_{ri}$    | 95        | 79     | 84        | 63     |
| Urgency rate variability                         | $S_u$       | 0.42      | 0.46   | 0.39      | 0.4    |
| Motor time variability (ms)                      | $S_t$       | 65        | 65     | 81        | 80     |

447 Note: Fixed parameter shown in bold typeface.

448

449 Table 4: Estimated parameters for the DDM

| Parameter                                      | Symbol     | DDM  |
|------------------------------------------------|------------|------|
| Drift rate (high coherence)                    | $v_h$      | 6.34 |
| Drift rate (low coherence)                     | $v_l$      | 3.5  |
| Bound (high coherence blocked)                 | $a_h$      | 0.17 |
| Bound (low coherence blocked)                  | $a_l$      | 0.18 |
| Bound (interleaved)                            | $a_i$      | 0.16 |
| Starting point bias (high coherence blocked)   | $z_{b_h}$  | 0.12 |
| Starting point bias (low coherence blocked)    | $z_{b_l}$  | 0.1  |
| Starting point bias (interleaved)              | $z_{b_i}$  | 0.11 |
| Nondecision time (high coherence blocked) (ms) | $T_{er_h}$ | 0.27 |
| Nondecision time (low coherence blocked) (ms)  | $T_{er_l}$ | 0.3  |
| Nondecision time (interleaved) (ms)            | $T_{er_i}$ | 0.31 |
| Starting-point variability                     | $S_z$      | 0.09 |
| Nondecision time variability                   | $S_t$      | 0.13 |
| Drift rate variability                         | $\eta$     | 6.39 |

450 **Decision Variable Simulations.** We qualitatively explored the correspondence between the fast  
 451 neural dynamics of the LRP and simulated decision process by plotting the difference between the  
 452 two DVs (Figure 4 B-C). The starting levels are not comparable because, unlike the simulated  
 453 process, the real LRP was baseline corrected, and the initially decreasing value bias in the  
 454 simulated waveforms is not seen in the LRP due to interfering posterior slow potentials (see Figure

455 2-Figure Supplement 2). There was, however, good correspondence between the dynamics from  
456 the onset of the deflection, which was notably absent in the alternative SustIE and SustSE model  
457 simulations (Figure 4-Figure Supplements 1,3). The BurstIE model effectively captured aspects of  
458 both EEG motor preparation signatures through its distinct countervailing biasing mechanisms.  
459 While our previous work compared the absolute value of the simulated cumulative evidence and  
460 bias function ( $x(t)$ ) to the centroparietal positivity (CPP)—an event related potential thought to be  
461 related to evidence accumulation (Kelly et al., 2021)—here this component was obscured by large  
462 potentials evoked by the sudden stimulus onset, and thus could not be reliably used in the same  
463 way.

464 **Jack-knifing Procedure for Model Comparison.** The variability in individual-participant EEG  
465 precluded us from performing neurally-constrained modeling at the individual level, so it was not  
466 possible to verify that this model comparison would hold for all participants. While the analysis  
467 represented in Figure 1-Figure Supplements 1 and 2 reassured us that the quantile-averaging of the  
468 data did not cause distortion, we nevertheless sought to take a step towards quantifying how much  
469 our participant selection affected the model comparison results. To this end, we repeated the model  
470 comparison for the 4 main neurally-constrained models and the DDM 17 times in turn with one  
471 participant excluded each time. The BurstIE model was strongly preferred for all of the samples (see  
472 Figure 4-Figure Supplement 5).

## 473 Discussion

474 Convergent evidence from motor preparation signals and behavioral modeling demonstrated that a  
475 dynamic sequence of opposing value biases and non-stationary evidence accumulation all played  
476 important roles in forming the rapid, multiphasic decisions on this task. In most decision-making  
477 models a “starting-point bias” parameter—shifting the starting point of accumulation—treats  
478 anticipatory biases as static adjustments before the process begins (Leite and Ratcliff, 2011; Mulder  
479 et al., 2012). Here, far from creating a stable starting point to kick off a stationary decision process,  
480 we found a dynamic pattern of biased motor preparation that is best understood as a two-  
481 dimensional race beginning well in advance of the stimulus. Constraining a behavioral model with  
482 these signals enabled us to characterize a surprisingly complex process, revealing biasing  
483 mechanisms that would otherwise have been inaccessible.

484 In agreement with previous research that has called for nonstationary accounts of value biasing in  
485 time-pressured decisions (Diederich and Busemeyer, 2006), we found that the value bias was  
486 largely concentrated in the early part of the process. The particular dynamics of the RDK stimulus,  
487 featuring a substantial lag between stimulus onset and the emergence of discriminatory sensory  
488 evidence, may have provided a focal point for the bias to be expressed separately from the  
489 evidence itself; indeed the model comparison very clearly favored the growing sensory evidence  
490 and noise. However, the signature expressions of this sequential detection-discrimination effect—  
491 namely, the almost purely value-driven nature of both the leading edge of RT distributions and of  
492 the initial stimulus-evoked LRP deflection—are observed also for discriminations of stimulus  
493 displacement (Noorbaloochi et al., 2015) and color (Afacan-Seref et al., 2018), suggesting the  
494 phenomenon generalises beyond the RDK stimulus. While our findings indicate that a strong  
495 transient drift-rate bias better captures the data relative to a sustained, constant bias, the possibility  
496 of a hybrid of the two, where the initial detection-triggered burst reduces to a smaller sustained bias,  
497 was not tested because it was assumed to go beyond a reasonable number of free parameters.  
498 Thus, uncertainty remains regarding the exact temporal profile of this stimulus-evoked bias, and we  
499 cannot say that it fully disappears beyond the burst.

500 The dynamic shift from value to evidence-driven accumulation is reminiscent of conflict tasks, for  
501 which a stationary drift rate is similarly insufficient to describe the observed behavioral patterns. In  
502 these tasks, the context in which a perceptual stimulus is presented (i.e. features of the stimulus

503 that are irrelevant to the task requirements) can be congruent with either the correct or the incorrect  
504 response. The latter case causes conflict that results in slower and more error-prone responding  
505 (Eriksen and Eriksen, 1974; Lu and Proctor, 1995; MacLeod, 1991), and produces signatures of  
506 competing motor plans in the LRP that are similar to those found here (Gratton et al., 1988).  
507 Prominent accounts of these tasks posit that an automatic processing of the stimulus happens in  
508 parallel with the controlled (decision) process (Servant et al., 2016; Ulrich et al., 2015). It is plausible  
509 that the LRP 'bolus' in our study could arise from a related mechanism in which the value cue  
510 automatically 'primes' a response, although it seems likely that value-biased responding is more  
511 intentional since it may confer a benefit in terms of the increased reward. Indeed, the patterns of  
512 biased anticipatory motor preparation we see in this study can not be present in tasks where the  
513 conflict does not arise until after stimulus onset; in such tasks the anticipatory mu/beta buildup  
514 activity while present is unbiased (Feuerriegel et al., 2021). In the case of these beta signals, the  
515 fact that the buildup happens earlier under speed pressure (Kelly et al., 2021) suggests that they  
516 are much more likely to be strategic rather than automatic, and we would not expect a bottom-up  
517 lateralization in response to the physical appearance of the cues due to their symmetric design.  
518 Nonetheless, even if different in nature, some of the functional dynamics arising from our value bias  
519 cues are interestingly similar to those arising from conflict tasks where both competing influences  
520 are externally presented.

521 The implication of a negative buildup-rate bias in urgency is counterintuitive but not completely  
522 without precedent. In the context of the DDM with unequal prior probabilities, Moran (2015) found  
523 that a negative drift-rate bias featured alongside a starting point bias in the optimal decision strategy  
524 under certain assumed bound settings, albeit not when bound settings were assumed controllable  
525 as part of the optimization calculation. Here, a similar tradeoff between the positive starting-level  
526 bias and negative urgency-rate bias may have arisen from the fact that the greater the starting point  
527 bias, the greater the need for a steeper low-value urgency signal to give it a chance to overtake the  
528 high-value signal when the low-value DV represents the correct response.

529 Understanding the processes generating the behaviors in this task rested on the neurophysiological  
530 identification of strategic urgency biases. The anticipatory nature of the early beta signal buildup  
531 aided in specifically linking it to evidence-independent urgency, and its incorporation in the model  
532 was key to understanding the subsequent processing of the motion stimulus. We conducted the  
533 modeling here on a grand-average level because grand-average beta-amplitude dynamics are  
534 much more robust than those of individuals, but this meant that we were unable to examine  
535 individual differences in behavior. The extent to which these different forms of bias might trade off  
536 each other at the individual level remains for now an open question. Nevertheless, the finding of a  
537 negative urgency rate bias as part of the participants' dominant strategy highlights the broad range  
538 of dynamic adjustments that can be made during fast-paced sensorimotor decisions.

## 539 Methods

540 **Participants.** The experiment involved one psychophysical training session and two EEG recording  
541 sessions. As the task was challenging, the training session served a dual purpose of giving  
542 participants the time to learn the task and to screen out those who found it too difficult. Twenty-nine  
543 adult human participants performed the training session. Eleven discontinued due to either  
544 insufficient performance on the task, or conflicting commitments. Eighteen participants (8 female)  
545 thus completed the two EEG sessions. Motor preparation biasing effects tend to be consistent and  
546 robust (e.g. effect sizes of at least  $d=1$  for similar "bolus" effects in Afacan-Seref et al., 2018), and  
547 15-18 participants provide 80% power to detect medium-to-large effect sizes. Participants all had  
548 normal or corrected-to-normal vision. They each provided informed, written consent to the  
549 procedures, which were approved by the Ethics Committee of the School of Psychology at Trinity  
550 College Dublin, and the Human Research Ethics Committee for the Sciences, at University College  
551 Dublin. Participants were compensated with €20 for the training session and €32 for their

552 participation in each EEG session with the potential to earn up to €12 extra depending on their  
553 performance. One of the participants was an author and the remainder were naive.

554 **Setup.** Participants were seated in a dark booth, with their heads stabilized in a chin rest placed 57  
555 cm from a cathode ray tube monitor (frame rate 75 Hz, resolution 1024 × 768) with a black  
556 background. They rested their left/right thumbs on the left/right buttons of a symmetric computer  
557 mouse secured to the table in front of them.

558 **Task.** The task was programmed in Psychtoolbox for MATLAB (Brainard, 1997). Trials began with  
559 the presentation of a central grey 0.25° fixation square. Upon achieving fixation (4° radius detection  
560 window, EyeLink 1000, SR Research), a value cue replaced the fixation square after either 400 or  
561 450 ms (randomly selected) and remained on screen, until the end of the trial (Figure 1). The cue  
562 consisted of equiluminant green and cyan arrows placed and pointing to the left and right of center,  
563 indicating the directions that would be worth 30 points (high value) or 10 points (low value) if  
564 subsequently presented and correctly responded to with the corresponding hand within the  
565 deadline. Incorrect or late responses were worth 0 points. Color-value assignment was randomly  
566 counterbalanced across participants. The RDK stimulus (5° diameter) appeared and commenced  
567 moving either 850 or 900 ms (randomly selected) after cue onset and lasted 600 or 781 ms for the  
568 shorter or longer deadline conditions, respectively. Participants were required to maintain fixation  
569 throughout, and upon stimulus offset received feedback on whether they were 'Correct!',  
570 'WRONG!', 'TOO SLOW!' or 'TOO EARLY! WAIT FOR CUE ...' or 'WAYYY TOO SLOW!' if they  
571 didn't respond at all before the dots turned off.

572 The task was performed in three blocked regimes: High coherence (51.2%) with a short deadline  
573 (365 ms); low coherence (19.2%) with a slightly longer deadline (475 ms); and interleaved high and  
574 low coherence with the longer deadline. The RDK stimulus was adapted from code from the  
575 Shadlen laboratory (Gold and Shadlen, 2003; Roitman and Shadlen, 2002). A set of white dots were  
576 presented within a circular aperture of 5° in diameter that was the same black color as the  
577 background. The dot density was 16.7 dots per °s. One third of the total number of dots was visible  
578 on screen at any one time; each dot remained on screen for one 13.3-ms frame and was replotted 2  
579 frames later as the 3 sets of dots were alternated. Depending on the coherence level, each dot had  
580 either a 19.2% or 51.2% chance of being replotted by an offset in the direction of coherent motion at  
581 a rate of 5°/s. Otherwise the dots were randomly relocated within the aperture. The first onset of  
582 coherent motion thus occurred 40 ms (3 frames) after the onset of the stimulus. If an offset dot was  
583 set to be plotted outside of the aperture, it was replotted in a random location on the edge of the  
584 aperture opposite to the direction of motion.

585 **Procedure.** So that participants could become familiar with the task, and particularly get used to its  
586 fast pace, they performed one session of psychophysical training before the main experimental  
587 sessions. Blocks in the training sessions comprised 80 trials. The session began with blocks of high-  
588 coherence trials with a long deadline and without value bias (20 points for each direction; both arrow  
589 cues were yellow). The deadline was gradually reduced to 365 ms. The same procedure was then  
590 followed for low-coherence blocks. If participants had great difficulty with the low coherence, the  
591 experimenter gave them some further practice starting at 45% and gradually brought it down to  
592 19.2%. Finally, participants practiced an equal number of biased blocks in the high-coherence, low-  
593 coherence, and interleaved high- and low-coherence regimes.

594  
595 Participants performed the two blocked regimes (5 or 6 blocks each of 120 trials) in one EEG  
596 recording session and the interleaved regime (10 or 12 blocks) in the other. Due to experimenter  
597 error, one participant performed the blocked experimental session twice and we included the data  
598 from both sessions in our analyses. The blocks within each regime were run consecutively to ensure  
599 that subjects would settle into a strategy, and the order of regimes and sessions was randomized. In  
600 training and throughout the EEG recording sessions, participants were encouraged to adopt a  
601 strategy that would maximize their points and were informed that the points earned in two randomly  
602 selected blocks (one per regime in the blocked session) would determine their bonus payment in



603 each recording session. Participants were provided with the total number of points earned at the  
604 end of the block as well as the number of points missed in the block for each trial type (blue and  
605 green) to motivate them and help them determine whether they were biasing too much or too little.  
606 The experimenters helped participants interpret this feedback and when needed provided frequent  
607 reminders that it was important to pay attention to both the value cue and the stimulus and that  
608 there were no points awarded for late responses.

609  
610 **Behavioral analyses.** RTs were measured relative to the onset of the RDK stimulus. RTs less than  
611 50 ms (0.23% of trials) were excluded from analyses and model fitting. Responses up to and  
612 beyond the deadline were included in all analyses so long as they occurred before the end of the  
613 RDK stimulus; trials without a response (0.21% of trials) were excluded. One participant was an  
614 outlier in terms of biasing (error rate difference between low-value and high-value trials fell more  
615 than two interquartile ranges above the upper quartile) and was excluded from further analyses.

616  
617 **Electrophysiological data analysis.** Continuous EEG data from 128 scalp electrodes were  
618 acquired using an ActiveTwo system (BioSemi, The Netherlands) and digitized at 1024 Hz. Offline  
619 analyses were performed using in-house MATLAB scripts (MathWorks, Natick, MA) using data  
620 reading, channel interpolation and topographic plot functions from the EEGLAB toolbox (Delorme  
621 and Makeig, 2004). EEG data were low-pass filtered by convolution with a 137-tap Hanning-  
622 windowed sinc function designed to provide a 3-dB corner frequency of 37 Hz with strong  
623 attenuation at the mains frequency (50 Hz), and detrended. The data were epoched from -150 to  
624 2450 ms relative to the cue onset. We identified and interpolated (spherical splines) channels with  
625 excessively high variance with respect to neighboring channels and channels that saturated or flat-  
626 lined during a given block. The data were then average-referenced, and trials were rejected upon  
627 detection of artifacts between cue and response (on any channel with magnitude  $> 70\mu\text{V}$ , or  $50\mu\text{V}$   
628 for the selected motor channels used in our analyses). Then, to mitigate the effects of volume  
629 conduction across the scalp, current source density (CSD) transformation was applied to the single-  
630 trial epochs (Kayser and Tenke, 2006; Kelly and O'Connell, 2013). Shorter cue-locked (-150 to  
631 1500ms), stimulus-locked (-1000 to 650ms) and response-locked (-400 to 210ms) event-related  
632 potentials (ERPs) were then extracted from the longer epochs, average-referenced and baseline  
633 corrected to the 100-ms window following the cue. The cue- and stimulus-locked LRP was  
634 calculated as the difference in ERP between electrodes at standard 10-20 sites C3 and C4 (Gratton  
635 et al., 1988), by subtracting the ERP ipsilateral to the correct response from the contralateral ERP.

636  
637 Beta-band activity was measured using a short-time Fourier transform applied to 300-ms windows  
638 stepped by 25 ms at a time, and by taking the mean amplitude in the range 14-30 Hz. We restricted  
639 our measurements to the beta band as opposed to including both mu and beta (Kelly et al., 2021) to  
640 avoid any potential interference from posterior alpha-band activity which is known to lateralise in  
641 situations where attention can be guided to the left or right. We found posterior lateralization to be  
642 minimal in the beta-band amplitude, and while there was an appreciable slope difference, this was  
643 clearly separated from the motor-related areas (see Figure 5A). To ensure precise measurements  
644 for model constraints, beta was measured from electrodes selected per individual based on  
645 exhibiting the strongest decrease at response relative to cue or stimulus onset. Standard sites  
646 C3/C4 were selected by default where difference-topography foci were close and symmetric (9 of 17  
647 subjects), and otherwise electrodes were selected among those proximal to the foci based on their  
648 exhibiting smooth decline in their amplitude timecourses from cue to response. Where uncertain,  
649 preference was given to symmetry across hemispheres and electrodes that reached a common  
650 threshold across conditions at response.

651  
652 For these individually-selected electrodes (marked in Figure 5A), the contralateral beta just prior to  
653 response (-50ms) reached a threshold across conditions (Figure 5B; the error bars in Figure 2B  
654 break this down further into value and response conditions). The ipsilateral beta diverged between  
655 the blocked high coherence and the other conditions, indicating a closer race for the most speed-  
656 pressured condition. When the standard C3/C4 sites were instead selected, however, we found an  
657 offset between the blocked conditions and the interleaved conditions (Figure 5C). This was

658 unexpected, but not entirely surprising due to the fact that the blocked and interleaved sessions  
 659 were performed on different days for all participants, and the different demands potentially resulted  
 660 in some global changes in measured beta amplitude not directly related to motor preparation. The  
 661 inset topographies show the overall difference in beta amplitude between the two sessions at  
 662 response; the difference does not appear to be of motor origin. As this difference was evident to a  
 663 similar degree before the stimulus onset, we recalculated the beta starting points and slopes with  
 664 the C3/C4 electrodes after first subtracting the offset between the two sessions at -50ms from  
 665 response from all beta traces. We found that the calculated neural constraints were similar  
 666 regardless of electrode choice (Table 5). The starting levels were almost identical except for a small  
 667 difference in the low-coherence-blocked levels both contralateral and ipsilateral to high value. The  
 668 steeper ipsilateral slope was also maintained and the difference relative to contralateral slope had a  
 669 similar magnitude. Due to our desire to obtain the clearest view of motor activity possible, we used  
 670 the individually-selected electrodes in our modeling and analyses.

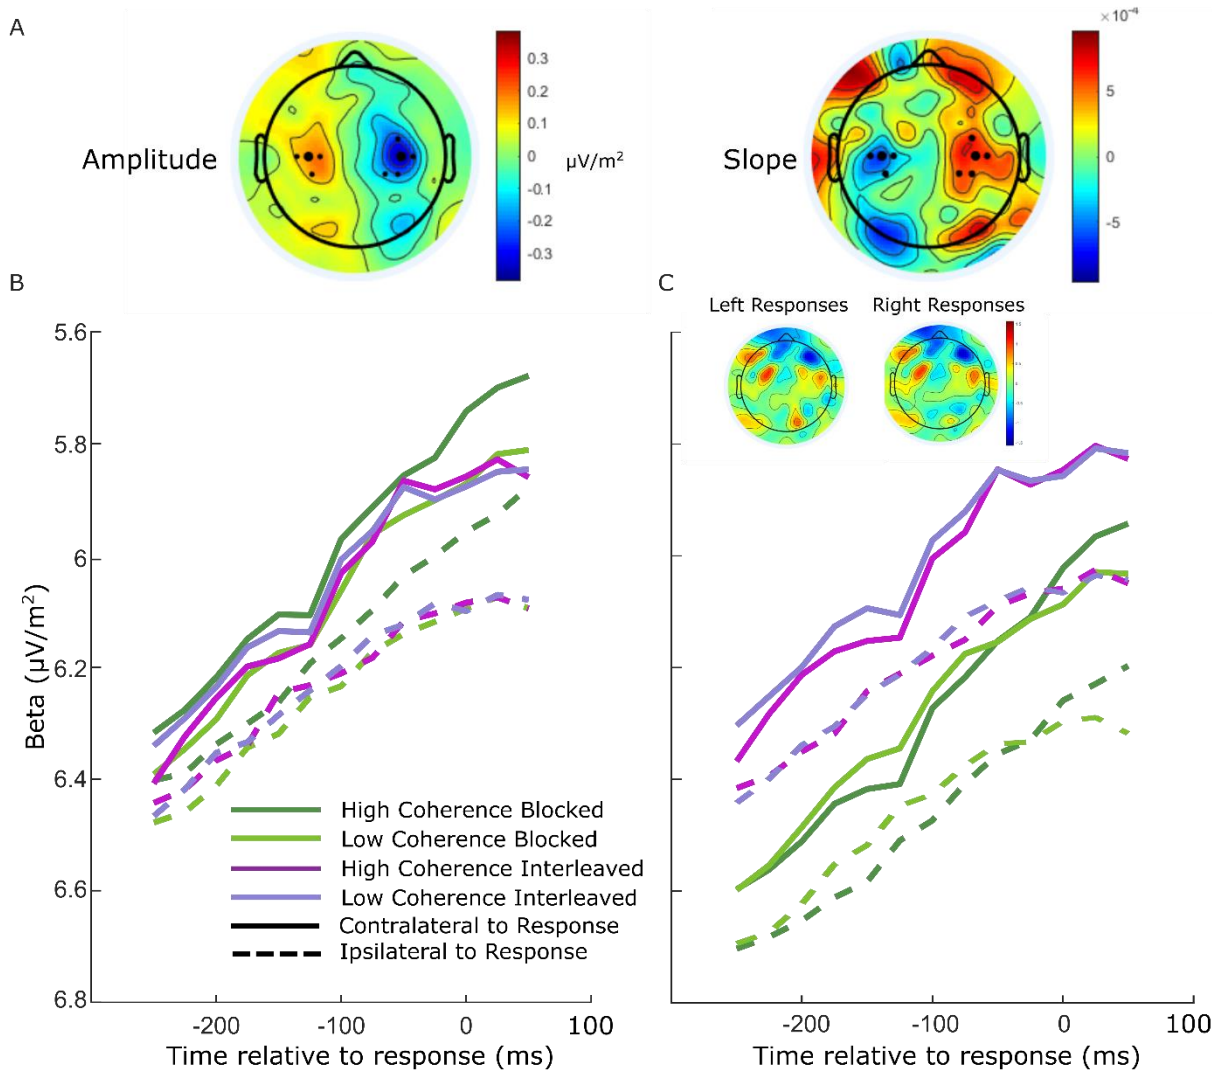

671  
 672 **Figure 5** Electrode selection for beta analysis. A Topographies of the difference between left- and  
 673 right-cued trials for beta amplitude at 750 ms relative to amplitude at the cue, and slope from 700-  
 674 800 ms after the cue. Standard sites C3/C4 are marked with large black dots, while other electrodes  
 675 that were selected for certain individuals are marked with smaller dots. B Response-locked beta  
 676 contralateral (solid) and ipsilateral (dashed) to response for the four conditions with individually  
 677 selected electrodes. C Same as B, but with standard sites C3/C4 selected for all participants.  
 678 Topographies show the average difference in beta amplitude between blocked and interleaved  
 679 conditions at -50ms relative to response, for right and left responses separately.

680  
 681

682 Table 5. Scaled beta start-points and slopes for individually-selected electrodes and C3/C4.

| Parameter | Individually selected |               |             | C3/C4          |               |             |
|-----------|-----------------------|---------------|-------------|----------------|---------------|-------------|
|           | High Coherence        | Low Coherence | Interleaved | High Coherence | Low Coherence | Interleaved |
| $Z_c$     | .33                   | .3            | .2          | .33            | .35           | .2          |
| $Z_i$     | .14                   | .003          | 0           | .12            | .06           | 0           |
| $U_c$     | 1.33                  | 1.06          | 1.26        | 1.24           | 0.95          | 1.17        |
| $U_i$     | 1.78                  | 1.66          | 1.76        | 1.66           | 1.61          | 1.63        |

683

684 **Statistical Approach.** Repeated measures ANOVAs with both Value and Regime/Conditions  
685 included as appropriate, were used to test for differences in behavioral and neural amplitude and  
686 slope measures, and followed up with pairwise, FDR-corrected t-tests using the Python package  
687 pingouin (Vallat, 2018). Given the study’s focus on mechanisms common to the various conditions,  
688 we state main effects of value in the main text, and address regime effects in the figure legends.  
689 The onsets for the beta signals were calculated using a jackknife procedure in which the traces  
690 were computed for the average signals of 16 subjects at a time, with each subject systematically  
691 excluded in turn, to compute the first time at which it exceeded 20% of the response threshold for  
692 that subgroup. The standard errors of each condition were then scaled up by 16 and a repeated-  
693 measures ANOVA was conducted.

694

695 **Modeling.** We fit several alternative bounded accumulation models to the data for comparison. In  
696 the neurally-constrained models, to linearly scale the pre-stimulus beta signals we defined the  
697 lowest “starting level” and bound to be 0 and 1, respectively. The mean contralateral beta amplitude  
698 50ms before response was mapped to the bound, while the condition with the lowest beta amplitude  
699 750ms after the cue was mapped to 0.

700

701 In the standard DDM (Ratcliff and McKoon, 2008), noisy evidence accumulated in one dimension as  
702 in Equation 7 but without drift-rate bias;  $B=0$ . Evidence accumulated to a fixed bound ( $a$ ) which  
703 varied across the 3 regimes, and there was no urgency. In each regime we allowed a separate  
704 biased mean starting point of accumulation ( $z_b$ ), with uniformly distributed variability  $s_z$  so that:

705

$$x(0) = \pm z_b + U(-s_z/2, s_z/2) \quad (16)$$

706 where  $z_b$  has a positive sign for high value trials, and a negative sign for low-value trials. A  
707 nondecision time ( $T_{er}$ ) parameter (different for each regime) was also perturbed by uniformly  
708 distributed variability ( $s$ ) and added to the decision time to obtain the final RT. There were 2 drift-  
709 rate parameters—one for each coherence—that were constant over time and common across the  
710 regimes, but varied from trial to trial in a Gaussian distribution with standard deviation  $\eta$ . By  
711 convention, the square root of the diffusion coefficient, or standard-deviation of the within-trial noise,  
712  $\sigma$ , was fixed at 0.1 and acted as a scaling parameter for the model.

713

714 We fit each model to 16 RT distributions (Figure 4 D-E): correct and error responses for high- and  
715 low-value trials across the four conditions. We partitioned each distribution into 6 bins bounded by  
716 the 0.1, 0.3, 0.5, 0.7 and 0.9 quantiles. Models were fit by minimising the chi-squared statistic  $G^2$ ,  
717 between the real quantiles and those obtained from Monte-Carlo simulated RT distributions:

$$G^2 = 2 \left( \sum_{c=1}^4 \sum_{v=1}^2 N_{c,v} \left[ \sum_{o=1}^2 \sum_{q=1}^6 p_{c,v,o,q} \log \frac{p_{c,v,o,q}}{\pi_{c,v,o,q}} \right] \right) \quad (17)$$

718 where  $p_{c,v,o,q}$  and  $\pi_{c,v,o,q}$  are the observed and predicted proportions of responses in bin  $q$ ,  
719 bounded by the quantiles, of outcome  $o$  (correct/error) of condition  $c$  (coherence  $x$ )

720 Blocked/Interleaved) and value  $v$  (high/low), respectively.  $N_{c,v}$  is the number of valid trials per  
721 condition and value.

722 In the model simulations the urgency signals were defined to equal their scaled (750 ms post-cue)  
723 beta levels at 100 ms prior to stimulus onset time. In the experiment, stimulus onset corresponded  
724 to 850 or 900 ms post cue; thus, we started the stimulus-evoked accumulation with a 50-ms delay  
725 on half of the trials and adjusted the RTs accordingly. For the IE models, the shape function  $\vartheta(t)$   
726 was obtained in our simulations by numerical integration. We searched the parameter space using  
727 the particle swarm optimization algorithm (Kennedy and Eberhart, 1995) as implemented in  
728 MATLAB, initialized with a number of swarms equal to 10 times the number of parameters to be  
729 estimated. To aid convergence we set the same random seed for each simulation within a search,  
730 which comprised 20,000 trials per value per condition. Because there was randomness associated  
731 with the optimization we ran it at least 4 times for each model. We then obtained a final  $G^2$  for each  
732 parameter vector by running a simulation with 2,000,000 trials and initialized with a different seed,  
733 and selected that with the lowest value. We performed model comparison using AIC, which  
734 penalises models for complexity:

$$AIC = G^2 + 2k \quad (18)$$

735 where  $k$  is the number of free parameters. We also calculated the Akaike weights (Burnham, K.P.  
736 and Anderson, D.R., 2002, p.75; Wagenmakers and Farrell, 2004), which can be cautiously  
737 interpreted as providing a probability that model  $i$  is the best model in the set:

$$W_i(AIC) = \frac{e^{-\frac{1}{2}\Delta_i(AIC)}}{\sum_{i=1}^k e^{-\frac{1}{2}\Delta_i(AIC)}} \quad (19)$$

738 Where  $\Delta_i(AIC)$  is the difference in AIC between model  $i$  and the best-fitting model.

739  
740 The simulated DVs for comparison with the real LRP were obtained by subtracting the average DV  
741 of the incorrect option from the correct option, time-locked to stimulus onset. We did not make the  
742 simulations fall back to zero upon bound crossing, and so the signals continue to build and become  
743 less comparable to the real average LRP once it peaks and falls due to responses being made.  
744 Initially we had allowed the possible range of burst durations to be a free parameter in the BurstIE  
745 model and obtained several equally good fits in which this parameter was spread over a wide range  
746 of values, trading off with the bias magnitude. We thus decided to constrain this parameter to  
747 correspond to the real LRP as closely as possible, with the understanding that within our framework  
748 we could not be certain of its exact form. We fit the model four times with the burst duration range  
749 set to 30, 50, 70 and 90 ms, and compared the time between burst onset and the low-value  
750 turnaround in the real LRP (53.7 ms) to those in the simulations. Finding the 70-ms duration range  
751 gave the closest match (52 ms), we then adjusted the duration-range parameter holding all others  
752 constant to obtain a 54-ms simulated LRP duration when the range parameter was set to 72 ms.  
753 We adopted this value in all further fits to the BurstIE and BurstSE models.

## 754 Acknowledgements

755 The authors thank Louisa Spence for data collection. This study was funded by the European  
756 Union's Horizon 2020 research and innovation programme under the Marie Skłodowska-Curie grant  
757 agreement No 842143, the European Research Council Starting Grant No 63829, the European  
758 Research Council Consolidator Grant IndDecision – 865474, the Irish Research Council  
759 (GOIPD/2017/1261), and by Science Foundation Ireland Grant No 15/CDA/3591. Most of the model  
760 fitting was performed on the Lonsdale cluster which is funded through grants from Science  
761 Foundation Ireland and maintained by the Trinity Centre for High Performance Computing  
762 (Research IT, Trinity College Dublin).

## 763 References

- 764 Afacan-Seref, K., Steinemann, N.A., Blangero, A., Kelly, S.P., 2018. Dynamic Interplay of Value and Sensory  
765 Information in High-Speed Decision Making. *Current Biology* 28, 795-802.e6.  
766 <https://doi.org/10.1016/j.cub.2018.01.071>
- 767 Blangero, A., Kelly, S.P., 2017. Neural Signature of Value-Based Sensorimotor Prioritization in Humans. *J.*  
768 *Neurosci.* 37, 10725–10737. <https://doi.org/10.1523/JNEUROSCI.1164-17.2017>
- 769 Bogacz, R., Wagenmakers, E.-J., Forstmann, B.U., Nieuwenhuis, S., 2010. The neural basis of the speed–  
770 accuracy tradeoff. *Trends in neurosciences* 33, 10–16. <https://doi.org/10.1016/j.tins.2009.09.002>
- 771 Brainard, D.H., 1997. The psychophysics toolbox. *Spatial vision* 10, 433–436.
- 772 Brown, S.D., Heathcote, A., 2008. The simplest complete model of choice response time: Linear ballistic  
773 accumulation. *Cognitive psychology* 57, 153–178. <https://doi.org/10.1016/j.cogpsych.2007.12.002>
- 774 Burnham, K.P., Anderson, D.R., 2002. Model selection and multimodel inference: A practical information-  
775 theoretic approach, 2nd ed. Springer, New York.
- 776 Churchland, A.K., Kiani, R., Shadlen, M.N., 2008. Decision-making with multiple alternatives. *Nature*  
777 *neuroscience* 11, 693–702. <https://doi.org/10.1038/nn.2123>
- 778 de Lange, F.P., Rahnev, D.A., Donner, T.H., Lau, H., 2013. Prestimulus oscillatory activity over motor cortex  
779 reflects perceptual expectations. *Journal of Neuroscience* 33, 1400–1410.  
780 <https://doi.org/10.1523/JNEUROSCI.1094-12.2013>
- 781 Delorme, A., Makeig, S., 2004. EEGLAB: an open source toolbox for analysis of single-trial EEG dynamics  
782 including independent component analysis. *Journal of neuroscience methods* 134, 9–21.  
783 <https://doi.org/10.1016/j.jneumeth.2003.10.009>
- 784 Devine, C.A., Gaffney, C., Loughnane, G.M., Kelly, S.P., O’Connell, R.G., 2019. The role of premature evidence  
785 accumulation in making difficult perceptual decisions under temporal uncertainty. *Elife* 8, e48526.
- 786 Diederich, A., Busemeyer, J.R., 2006. Modeling the effects of payoff on response bias in a perceptual  
787 discrimination task: Bound-change, drift-rate-change, or two-stage-processing hypothesis.  
788 *Perception & Psychophysics* 68, 194–207. <https://doi.org/10.3758/BF03193669>
- 789 Donner, T.H., Siegel, M., Fries, P., Engel, A.K., 2009. Buildup of choice-predictive activity in human motor  
790 cortex during perceptual decision making. *Current Biology* 19, 1581–1585.  
791 <https://doi.org/10.1016/j.cub.2009.07.066>
- 792 Drugowitsch, J., Moreno-Bote, R., Churchland, A.K., Shadlen, M.N., Pouget, A., 2012. The cost of  
793 accumulating evidence in perceptual decision making. *Journal of Neuroscience* 32, 3612–3628.
- 794 Eriksen, B.A., Eriksen, C.W., 1974. Effects of noise letters upon the identification of a target letter in a  
795 nonsearch task. *Perception & psychophysics* 16, 143–149.
- 796 Evans, N.J., Trueblood, J.S., Holmes, W.R., 2020. A parameter recovery assessment of time-variant models of  
797 decision-making. *Behavior research methods* 52, 193–206.
- 798 Feng, S., Holmes, P., Rorie, A., Newsome, W.T., 2009. Can monkeys choose optimally when faced with noisy  
799 stimuli and unequal rewards? *PLoS computational biology* 5, e1000284.  
800 <https://doi.org/10.1371/journal.pcbi.1000284>
- 801 Feuerriegel, D., Jiwa, M., Turner, W.F., Andrejević, M., Hester, R., Bode, S., 2021. Tracking dynamic  
802 adjustments to decision making and performance monitoring processes in conflict tasks.  
803 *Neuroimage* 238, 118265.
- 804 Gluth, S., Rieskamp, J., Büchel, C., 2013. Classic EEG motor potentials track the emergence of value-based  
805 decisions. *NeuroImage* 79, 394–403. <https://doi.org/10.1016/j.neuroimage.2013.05.005>
- 806 Gold, J.I., Shadlen, M.N., 2003. The influence of behavioral context on the representation of a perceptual  
807 decision in developing oculomotor commands. *Journal of Neuroscience* 23, 632–651.  
808 <https://doi.org/10.1523/JNEUROSCI.23-02-00632.2003>
- 809 Gratton, G., Coles, M.G., Sirevaag, E.J., Eriksen, C.W., Donchin, E., 1988. Pre-and poststimulus activation of  
810 response channels: a psychophysiological analysis. *Journal of Experimental Psychology: Human*  
811 *perception and performance* 14, 331. <https://doi.org/10.1037/0096-1523.14.3.331>

- 812 Hanks, T., Kiani, R., Shadlen, M.N., 2014. A neural mechanism of speed-accuracy tradeoff in macaque area  
813 LIP. *Elife* 3, e02260. <https://doi.org/10.7554/eLife.02260>
- 814 Hanks, T.D., Mazurek, M.E., Kiani, R., Hopp, E., Shadlen, M.N., 2011. Elapsed decision time affects the  
815 weighting of prior probability in a perceptual decision task. *Journal of Neuroscience* 31, 6339–6352.  
816 <https://doi.org/10.1523/JNEUROSCI.5613-10.2011>
- 817 Hawkins, G.E., Forstmann, B.U., Wagenmakers, E.-J., Ratcliff, R., Brown, S.D., 2015. Revisiting the evidence  
818 for collapsing boundaries and urgency signals in perceptual decision-making. *Journal of*  
819 *Neuroscience* 35, 2476–2484.
- 820 Kayser, J., Tenke, C.E., 2006. Principal components analysis of Laplacian waveforms as a generic method for  
821 identifying ERP generator patterns: I. Evaluation with auditory oddball tasks. *Clinical*  
822 *neurophysiology* 117, 348–368. <https://doi.org/10.1016/j.clinph.2005.08.034>
- 823 Kelly, S.P., Corbett, E.A., O’Connell, R.G., 2021. Neurocomputational mechanisms of prior-informed  
824 perceptual decision-making in humans. *Nature Human Behaviour* 5, 467–481.  
825 <https://doi.org/10.1038/s41562-020-00967-9>
- 826 Kelly, S.P., O’Connell, R.G., 2013. Internal and external influences on the rate of sensory evidence  
827 accumulation in the human brain. *The Journal of Neuroscience* 33, 19434–19441.  
828 <https://doi.org/10.1523/JNEUROSCI.3355-13.2013>
- 829 Kennedy, J., Eberhart, R., 1995. Particle swarm optimization, in: *Proceedings of the IEEE International*  
830 *Conference on Neural Networks*. IEEE, Perth, Australia, pp. 1942–1948.
- 831 Leite, F.P., Ratcliff, R., 2011. What cognitive processes drive response biases? A diffusion model analysis.  
832 *Judgment & Decision Making* 6.
- 833 Link, S.W., Heath, R.A., 1975. A sequential theory of psychological discrimination. *Psychometrika* 40, 77–105.
- 834 Lu, C.-H., Proctor, R.W., 1995. The influence of irrelevant location information on performance: A review of  
835 the Simon and spatial Stroop effects. *Psychonomic bulletin & review* 2, 174–207.
- 836 MacLeod, C.M., 1991. Half a century of research on the Stroop effect: an integrative review. *Psychological*  
837 *bulletin* 109, 163.
- 838 Malhotra, G., Leslie, D.S., Ludwig, C.J., Bogacz, R., 2017. Overcoming indecision by changing the decision  
839 boundary. *Journal of Experimental Psychology: General* 146, 776.
- 840 Moran, R., 2015. Optimal decision making in heterogeneous and biased environments. *Psychonomic bulletin*  
841 *& review* 22, 38–53. <https://doi.org/10.3758/s13423-014-0669-3>
- 842 Mulder, M.J., Wagenmakers, E.-J., Ratcliff, R., Boekel, W., Forstmann, B.U., 2012. Bias in the brain: a diffusion  
843 model analysis of prior probability and potential payoff. *The Journal of Neuroscience* 32, 2335–2343.  
844 <https://doi.org/10.1523/JNEUROSCI.4156-11.2012>
- 845 Murphy, P.R., Boonstra, E., Nieuwenhuis, S., 2016. Global gain modulation generates time-dependent  
846 urgency during perceptual choice in humans. *Nature communications* 7, 13526.  
847 <https://doi.org/10.1038/ncomms13526>
- 848 Noorbaloochi, S., Sharon, D., McClelland, J.L., 2015. Payoff information biases a fast guess process in  
849 perceptual decision making under deadline pressure: evidence from behavior, evoked potentials,  
850 and quantitative model comparison. *Journal of Neuroscience* 35, 10989–11011.  
851 <https://doi.org/10.1523/JNEUROSCI.0017-15.2015>
- 852 O’Connell, R.G., Dockree, P.M., Kelly, S.P., 2012. A supramodal accumulation-to-bound signal that  
853 determines perceptual decisions in humans. *Nature neuroscience* 15, 1729–1735.  
854 <https://doi.org/10.1038/nn.3248>
- 855 O’Connell, R.G., Shadlen, M.N., Wong-Lin, K., Kelly, S.P., 2018. Bridging Neural and Computational  
856 Viewpoints on Perceptual Decision-Making. *Trends in Neurosciences* 41, 838–852.  
857 <https://doi.org/10.1016/j.tins.2018.06.005>
- 858 Pfurtscheller, G., 1981. Central beta rhythm during sensorimotor activities in man. *Electroencephalography*  
859 *and clinical neurophysiology* 51, 253–264.
- 860 Ratcliff, R., 1978. A theory of memory retrieval. *Psychological review* 85, 59. <https://doi.org/10.1037/0033-295X.85.2.59>
- 861

- 862 Ratcliff, R., McKoon, G., 2008. The diffusion decision model: theory and data for two-choice decision tasks.  
863 *Neural computation* 20, 873–922. <https://doi.org/10.1162/neco.2008.12-06-420>
- 864 Ratcliff, R., Tuerlinckx, F., 2002. Estimating parameters of the diffusion model: Approaches to dealing with  
865 contaminant reaction times and parameter variability. *Psychonomic bulletin & review* 9, 438–481.
- 866 Rinkebaer, G., Osman, A., Ulrich, R., Müller-Gethmann, H., Mattes, S., 2004. On the locus of speed-accuracy  
867 trade-off in reaction time: inferences from the lateralized readiness potential. *Journal of*  
868 *Experimental Psychology: General* 133, 261. <https://doi.org/10.1037/0096-3445.133.2.261>
- 869 Roitman, J.D., Shadlen, M.N., 2002. Response of neurons in the lateral intraparietal area during a combined  
870 visual discrimination reaction time task. *Journal of neuroscience* 22, 9475–9489.  
871 <https://doi.org/10.1523/JNEUROSCI.22-21-09475.2002>
- 872 Rorie, A.E., Gao, J., McClelland, J.L., Newsome, W.T., 2010. Integration of sensory and reward information  
873 during perceptual decision-making in lateral intraparietal cortex (LIP) of the macaque monkey. *PLoS*  
874 *one* 5, e9308. <https://doi.org/10.1371/journal.pone.0009308>
- 875 Servant, M., White, C., Montagnini, A., Burle, B., 2016. Linking Theoretical Decision-making Mechanisms in  
876 the Simon Task with Electrophysiological Data: A Model-based Neuroscience Study in Humans.  
877 *Journal of Cognitive Neuroscience* 28, 1501–1521. [https://doi.org/10.1162/jocn\\_a\\_00989](https://doi.org/10.1162/jocn_a_00989)
- 878 Shinn, M., Ehrlich, D.B., Lee, D., Murray, J.D., Seo, H., 2020. Confluence of timing and reward biases in  
879 perceptual decision-making dynamics. *Journal of Neuroscience* 40, 7326–7342.  
880 <https://doi.org/10.1523/JNEUROSCI.0544-20.2020>
- 881 Simen, P., Contreras, D., Buck, C., Hu, P., Holmes, P., Cohen, J.D., 2009. Reward rate optimization in two-  
882 alternative decision making: empirical tests of theoretical predictions. *Journal of Experimental*  
883 *Psychology: Human Perception and Performance* 35, 1865. <https://doi.org/10.1037/a0016926>
- 884 Smith, P.L., Corbett, E.A., 2019. Speeded multielement decision-making as diffusion in a hypersphere: Theory  
885 and application to double-target detection. *Psychonomic bulletin & review* 26, 127–162.
- 886 Smith, P.L., Lilburn, S.D., 2020. Vision for the blind: visual psychophysics and blinded inference for decision  
887 models. *Psychonomic Bulletin & Review*. <https://doi.org/10.3758/s13423-020-01742-7>
- 888 Smith, P.L., Ratcliff, R., 2021. Modeling evidence accumulation decision processes using integral equations:  
889 Urgency-gating and collapsing boundaries. *Psychological Review*.  
890 <https://doi.org/10.1037/rev0000301>
- 891 Smith, P.L., Ratcliff, R., 2009. An integrated theory of attention and decision making in visual signal  
892 detection. *Psychological review* 116, 283. <https://doi.org/10.1037/a0015156>
- 893 Smith, P.L., Ratcliff, R., 2004. Psychology and neurobiology of simple decisions. *Trends in neurosciences* 27,  
894 161–168. <https://doi.org/10.1016/j.tins.2004.01.006>
- 895 Smith, P.L., Ratcliff, R., Sewell, D.K., 2014. Modeling perceptual discrimination in dynamic noise: Time-  
896 changed diffusion and release from inhibition. *Journal of Mathematical Psychology* 59, 95–113.  
897 <https://doi.org/10.1016/j.jmp.2013.05.007>
- 898 Stanford, T.R., Shankar, S., Massoglia, D.P., Costello, M.G., Salinas, E., 2010. Perceptual decision making in  
899 less than 30 milliseconds. *Nature neuroscience* 13, 379. <https://doi.org/10.1038/nn.2485>
- 900 Steinemann, N.A., O’Connell, R.G., Kelly, S.P., 2018. Decisions are expedited through multiple neural  
901 adjustments spanning the sensorimotor hierarchy. *Nature communications* 9, 1–13.  
902 <https://doi.org/10.1038/s41467-018-06117-0>
- 903 Summerfield, C., Koechlin, E., 2010. Economic Value Biases Uncertain Perceptual Choices in the Parietal and  
904 Prefrontal Cortices. *Front. Hum. Neurosci.* 4. <https://doi.org/10.3389/fnhum.2010.00208>
- 905 Thomas, E.A., Ross, B.H., 1980. On appropriate procedures for combining probability distributions within the  
906 same family. *Journal of Mathematical Psychology* 21, 136–152.
- 907 Thura, D., Cisek, P., 2014. Deliberation and Commitment in the Premotor and Primary Motor Cortex during  
908 Dynamic Decision Making. *Neuron* 81, 1401–1416. <https://doi.org/10.1016/j.neuron.2014.01.031>
- 909 Trueblood, J.S., Heathcote, A., Evans, N.J., Holmes, W.R., 2021. Urgency, leakage, and the relative nature of  
910 information processing in decision-making. *Psychological Review* 128, 160.

- 911 Ulrich, R., Schröter, H., Leuthold, H., Birngruber, T., 2015. Automatic and controlled stimulus processing in  
912 conflict tasks: Superimposed diffusion processes and delta functions. *Cognitive psychology* 78, 148–  
913 174.
- 914 Urai, A.E., De Gee, J.W., Tsetsos, K., Donner, T.H., 2019. Choice history biases subsequent evidence  
915 accumulation. *Elife* 8, e46331. <https://doi.org/https://doi.org/10.7554/eLife.46331>
- 916 Usher, M., McClelland, J.L., 2001. The time course of perceptual choice: the leaky, competing accumulator  
917 model. *Psychological review* 108, 550. <https://doi.org/10.1037/0033-295X.108.3.550>
- 918 Vallat, R., 2018. Pingouin: statistics in Python. *J. Open Source Softw.* 3, 1026.
- 919 Van Vugt, M.K., Simen, P., Nystrom, L., Holmes, P., Cohen, J.D., 2014. Lateralized readiness potentials reveal  
920 properties of a neural mechanism for implementing a decision threshold. *PloS one* 9, e90943.  
921 <https://doi.org/10.1371/journal.pone.0090943>
- 922 Voss, A., Rothermund, K., Voss, J., 2004. Interpreting the parameters of the diffusion model: An empirical  
923 validation. *Memory & cognition* 32, 1206–1220. <https://doi.org/10.3758/BF03196893>
- 924 Wagenmakers, E.-J., Farrell, S., 2004. AIC model selection using Akaike weights. *Psychonomic bulletin &*  
925 *review* 11, 192–196.
- 926 Weindel, G., Anders, R., Alario, F., Burle, B., 2021. Assessing model-based inferences in decision making with  
927 single-trial response time decomposition. *Journal of Experimental Psychology: General*.
- 928 White, C.N., Poldrack, R.A., 2014. Decomposing bias in different types of simple decisions. *Journal of*  
929 *Experimental Psychology: Learning, Memory, and Cognition* 40, 385.  
930 <https://doi.org/10.1037/a0034851>  
931
- 932



933 **Figure Supplements**

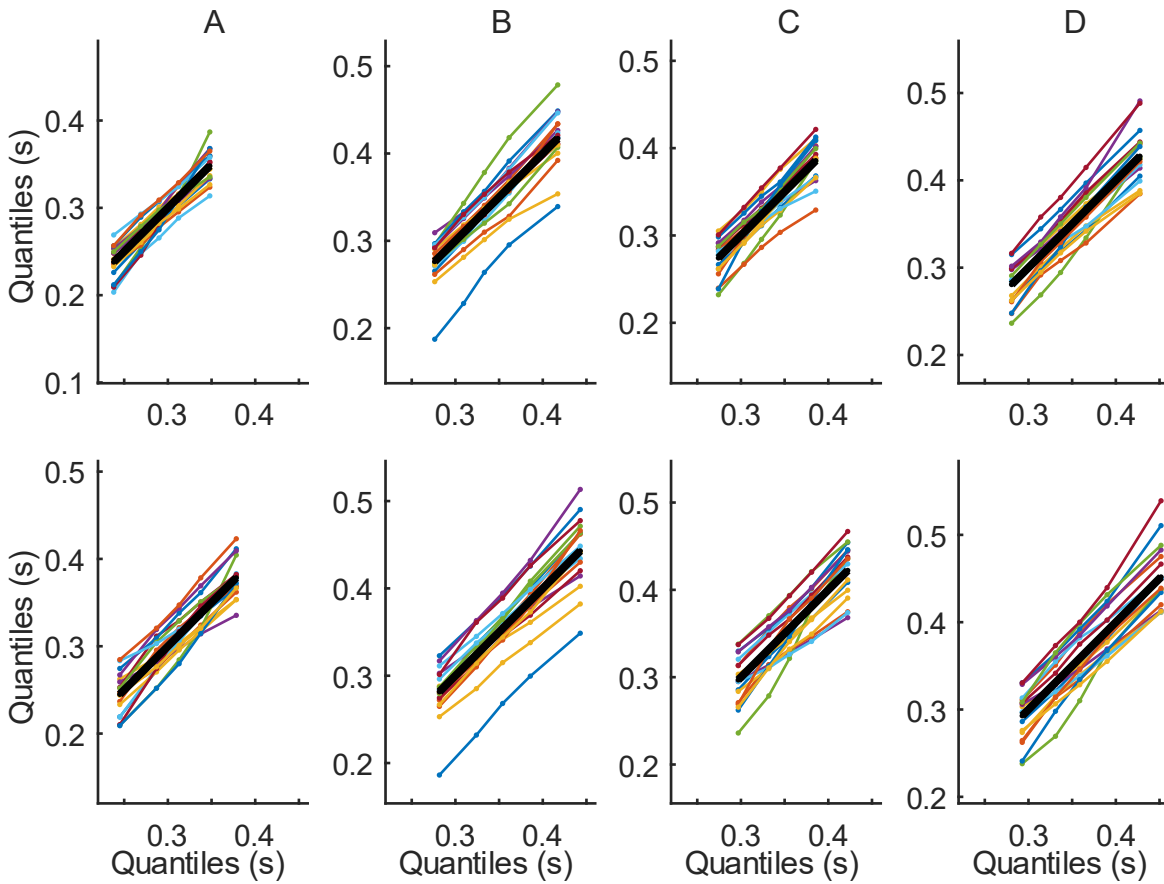

934

935 Figure 1- Figure Supplement 1 Quantile-Quantile plots. Marginal RT distribution quantiles for each  
936 participant plotted against the group-averaged quantiles, for high-value (top) and low-value (bottom)  
937 trials. The thick black line represents the group average plotted against itself. A High-coherence  
938 blocked; B low-coherence blocked; C high-coherence interleaved; D low-coherence interleaved.

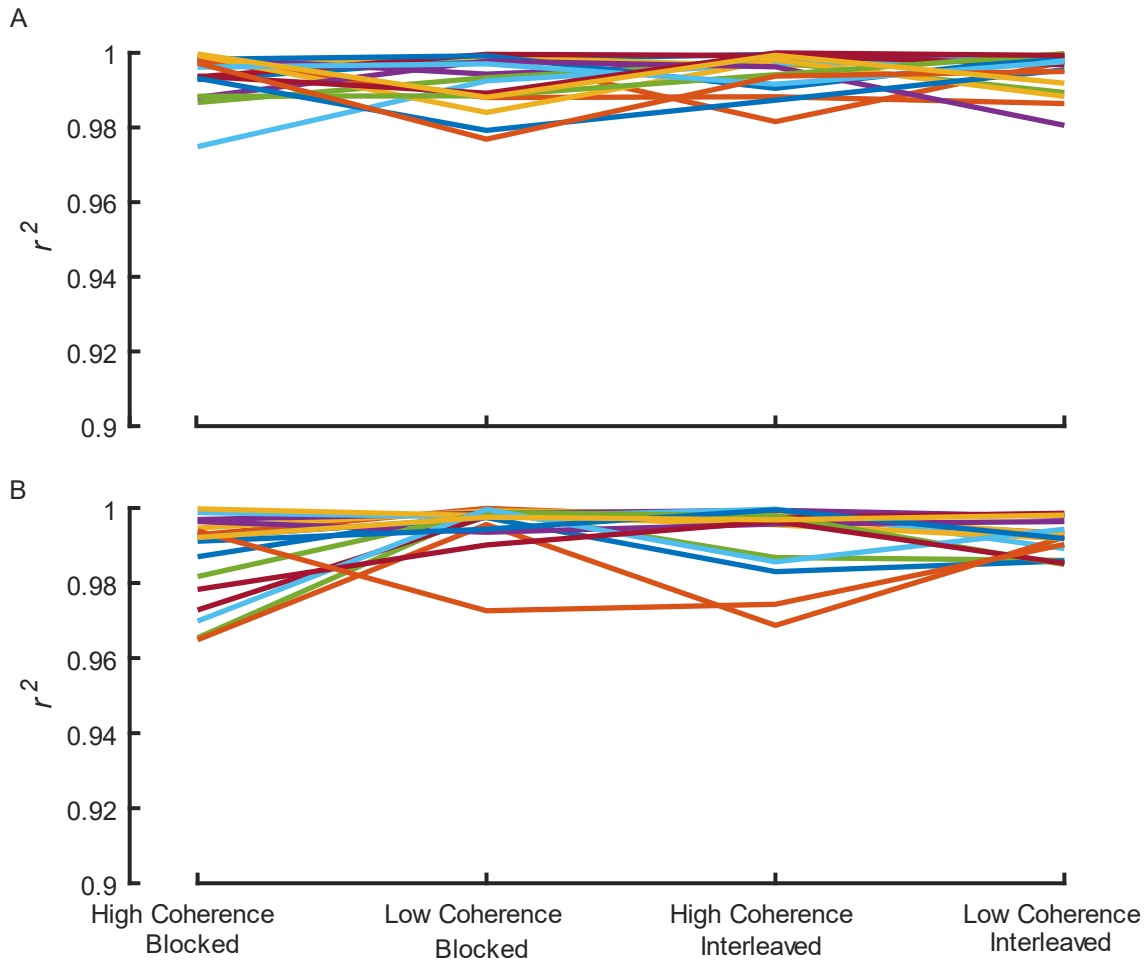

939

940 Figure 1- Figure Supplement 2. Individual-group quantile correlation ( $r^2$ ) statistics for A high-value  
941 and B low-value trial distributions. Each line represents an individual participant.

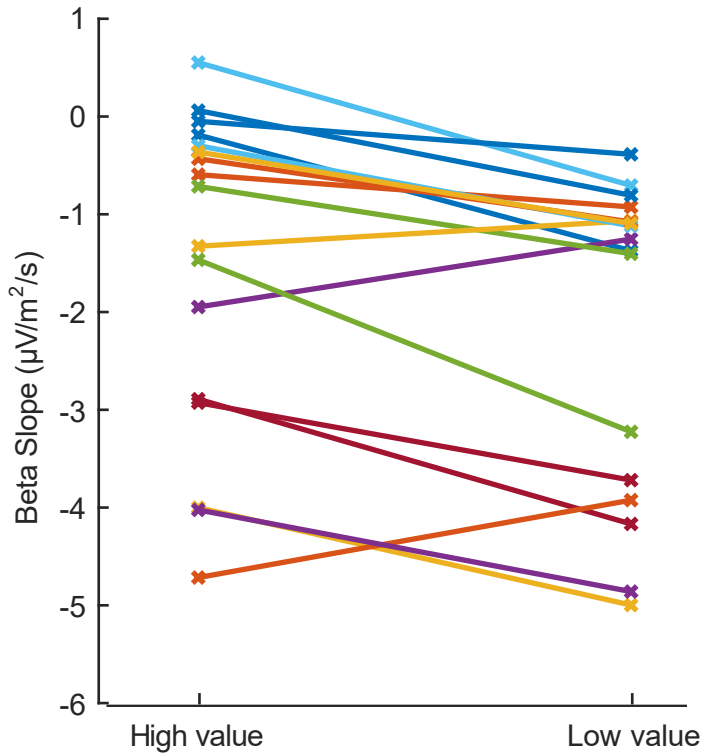

942

943 Figure 2- Figure Supplement 1. Slope of each individual's beta decrease at 700-800ms after the  
944 cue, for motor preparation contralateral to the high and low value alternatives, averaged across  
945 regimes. Note that the slopes shown here are negative as beta is a decreasing signal. The buildup  
946 for the low-value alternative is steeper for 14 of the 17 individuals.

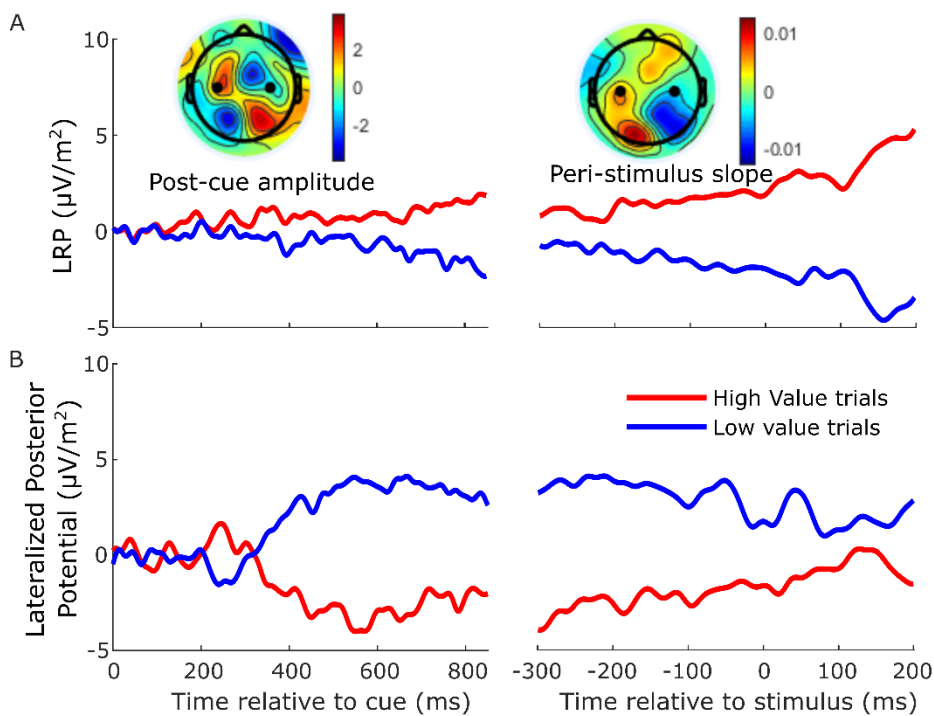

947

948 Figure 2-Figure Supplement 2. A slow-moving posterior potential interfered with measurement of the  
949 LRP between cue and motion stimulus, leading us to rely solely on beta-band activity to examine  
950 anticipatory motor preparation. ERPs ipsilateral-contralateral to correct response, so that deflection

951 upward corresponds to relative motor preparation in the correct direction, between cue and stimulus  
 952 (left) and locked to the stimulus onset (right). A. LRP (standard sites C3/C4- see black dots in  
 953 topographies), and B. Lateralized posterior potential (calculated in the exact same way as the LRP  
 954 but using parietal electrodes A5 and A18 on the left; A31 and B5 on the right, Biosemi 128-channel  
 955 cap). The LRP following the onset of the cue appeared to show a slowly growing bias towards the  
 956 cued direction which, contrary to our findings of a tapering relative bias in beta, persisted up to and  
 957 following the stimulus onset. However, the difference topography (left inset) of left- minus right-cued  
 958 trials just before stimulus onset (700-800 ms after the cue) relative to cue onset (-50-50 ms) shows  
 959 that, that in addition to motor preparation, the topography was dominated by a posterior potential of  
 960 the opposite polarity. This slow posterior potential begins to grow at around 300 ms after the cue  
 961 and then begins to decrease after around 600 ms, calling for an accounting of potential overlap  
 962 effects in interpreting the LRP dynamics between cue and stimulus. The relative beta amplitude  
 963 timecourse (Figure 2C) shows that relative preparation for the high value alternative begins before  
 964 400 ms, at which time the LRP here appears quite stable. However, it is likely that the  
 965 simultaneously increasing, opposing posterior potential may at that point be suppressing the  
 966 expression of a motor preparation bias towards high value in the LRP. Then, as the relative beta  
 967 preparation begins to decline at around 600 ms, the posterior potential is also beginning its decline  
 968 and inducing what appears as an increasing bias to high value in the LRP. The right inset  
 969 topography shows the difference in slope for left and right- cued trials from -200 to +100ms  
 970 relative to the stimulus. It is clear that this slow drift towards high value visible in the LRP is primarily  
 971 posterior in origin. For this reason, we did not rely on the LRP to examine the anticipatory motor  
 972 preparation dynamics, but rather restricted its use to the analyses of stimulus-evoked activity, and  
 973 baseline corrected the signal to stimulus onset.  
 974

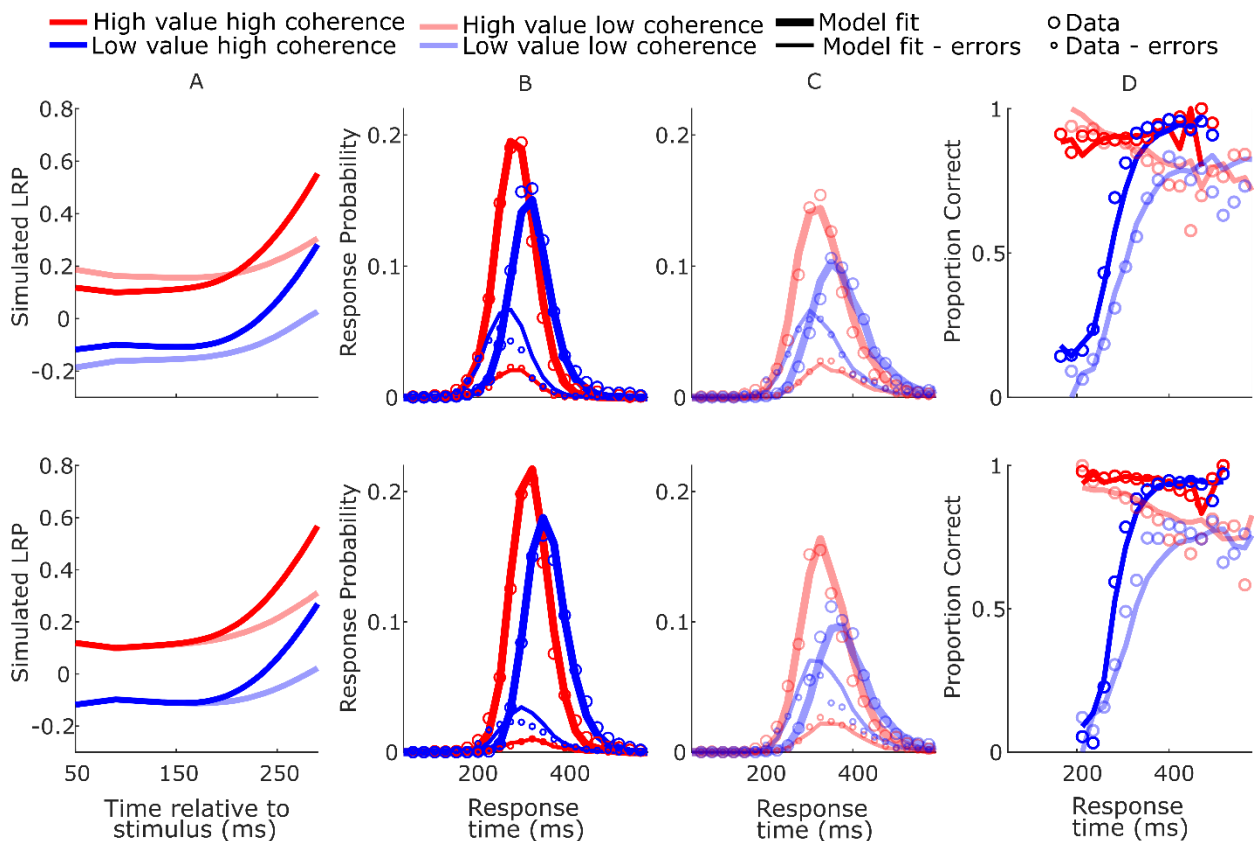

975

976 Figure 4-Figure Supplement 1. SustIE model-simulated waveforms and behavior for blocked  
 977 session (top row) and interleaved session (bottom row). A Mean difference between simulated DVs;  
 978 B-C Real (circles) and model-simulated (solid lines) RT distributions. D Real and model-simulated  
 979 CAFs.

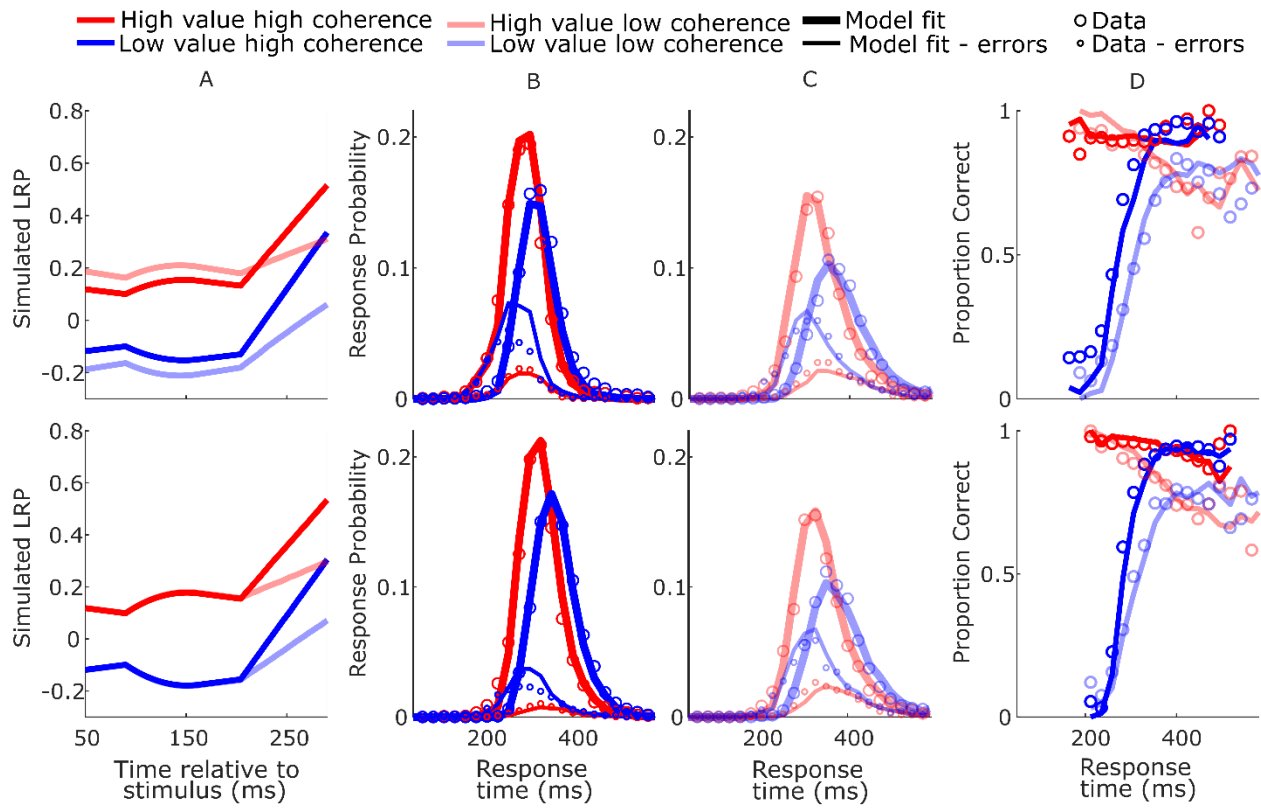

980

981 Figure 4-Figure Supplement 2. BurstSE model-simulated waveforms and behavior for blocked  
 982 session (top row) and interleaved session (bottom row). A Mean difference between simulated DVs;  
 983 B-C Real (circles) and model-simulated (solid lines) RT distributions. D Real and model-simulated  
 984 CAFs.  
 985

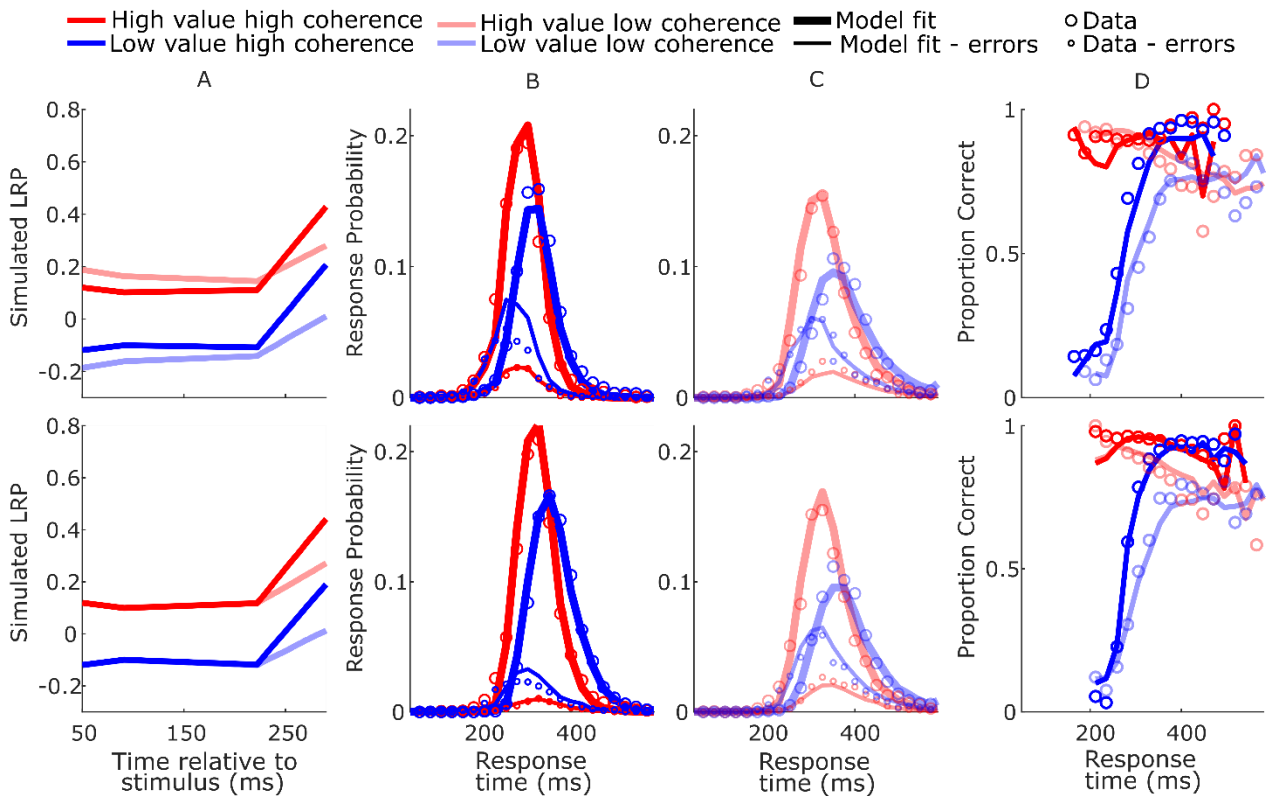

986

987 Figure 4-Figure Supplement 3. SustSE model-simulated waveforms and behavior for blocked  
988 session (top row) and interleaved session (bottom row). A Mean difference between simulated DVs;  
989 B-C Real (circles) and model-simulated (solid lines) RT distributions. D Real and model-simulated  
990 CAFs.  
991

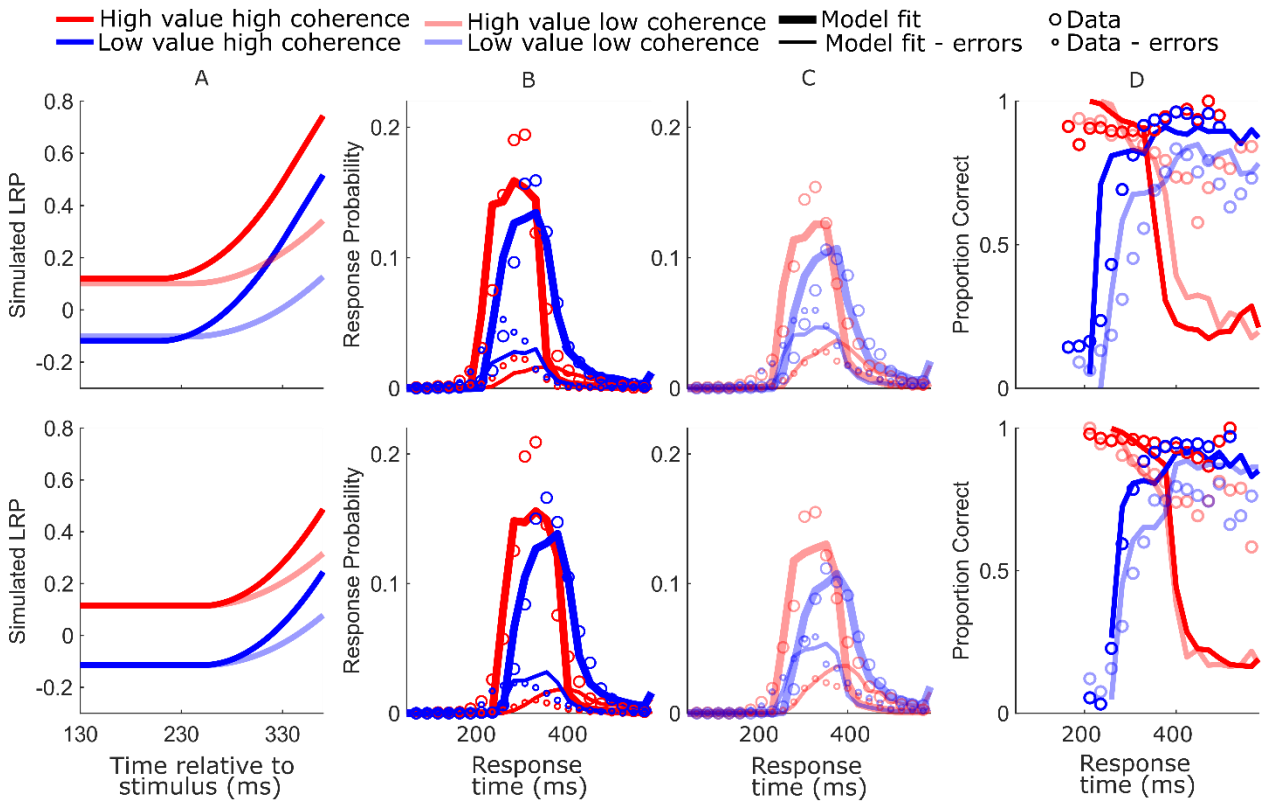

992  
993 Figure 4-Figure Supplement 4. DDM model-simulated waveforms and behavior for blocked session  
994 (top row) and interleaved session (bottom row). A Mean simulated DV. Note the timing of the  
995 displayed DV is delayed by 80ms relative to the neurally-constrained model figures to approximately  
996 adjust for the motor component of the estimated nondecision time; B-C Real (circles) and model-  
997 simulated (solid lines) RT distributions. D Real and model-simulated CAFs.  
998

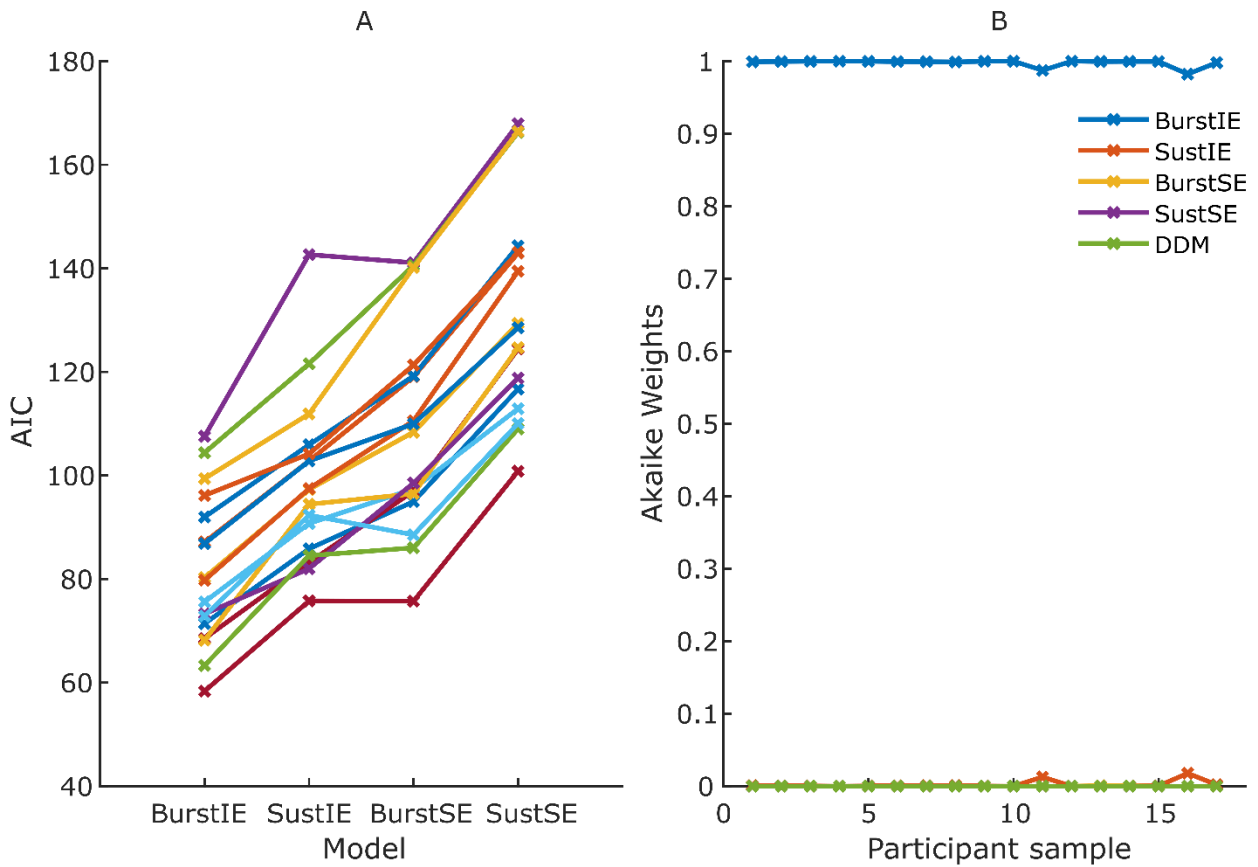

999 Figure 4-Figure Supplement 5. Results of Jackknifing analysis. A AIC for each jackknifed sample for  
1000 the four main neurally-constrained models. DDM is excluded here to aid visibility, as its fits were  
1001 markedly worse than the rest. B Akaike weights assigned to the 5 models, including DDM, for each  
1002 jackknifed sample. The BurstIE model was strongly preferred for all samples.  
1003  
1004  
1005  
1006
